# Supplementary material for: Key determinants of the dual clamp/activator function of Complexin
Source: eLife. 2024 Nov 25;12:RP92438. doi: 10.7554/eLife.92438 (PMC11589869; doi:10.7554/eLife.92438)
Supplement: Figure 1—source data 1. [file elife-92438-fig1-data1.xlsx]

## Sheet: Fig. 1C RRP
Figure	Parameter	Statistical Test	P-value	Parameter	CpxII ko	CpxII ko+CpxII wt	CpxII ko+CpxII 1-115	CpxIIko+CpxI 1-115 amph.helix	Dunn's multiple comparisons test	Mean rank diff.	Significant?	Summary	Adjusted P Value
Fig. 1C	RRP	Kruskal-Wallis test	<0.0001	Number of values	11	15	14	16	CpxII ko vs. CpxII ko+CpxII wt	-28.92	Yes	****	<0.0001
									CpxII ko vs. CpxII ko+CpxII 1-115	-10.25	No	ns	0.7121
				Minimum	7.106e-24	44.39	7.954	61.81	CpxII ko vs. CpxIIko+CpxI 1-115 amph.helix	-29.31	Yes	****	<0.0001
				25% Percentile	3.24e-21	86.09	26.9	91.45	CpxII ko+CpxII wt vs. CpxII ko+CpxII 1-115	18.66	Yes	*	0.0125
				Median	15.51	151.8	53.39	107.6	CpxII ko+CpxII wt vs. CpxIIko+CpxI 1-115 amph.helix	-0.3917	No	ns	>0.9999
				75% Percentile	63.43	212	70.45	180.7	CpxII ko+CpxII 1-115 vs. CpxIIko+CpxI 1-115 amph.helix	-19.05	Yes	**	0.0085
				Maximum	67.17	387.9	199.2	306.6
				Mean	24.96	153.4	60.06	136.7
				Std. Deviation	26.95	92.93	48.39	65.48
				Std. Error of Mean	8.127	24	12.93	16.37
				Lower 95% CI	6.851	101.9	32.12	101.8
				Upper 95% CI	43.06	204.9	88	171.6
				Mean ranks	9.818	38.73	20.07	39.13

## Sheet: Fig.1C SRP
Figure	Parameter	Statistical Test	P-value	Parameter	CpxII ko	CpxII ko+CpxII wt	CpxII ko+CpxII 1-115	CpxIIko+CpxI 1-115 amph.helix	Tukey's multiple comparisons test	Mean Diff.	95.00% CI of diff.	Below threshold?	Summary	Adjusted P Value
Fig. 1C	SRP	one-way ANOVA	0.0014	Number of values	15	15	14	16	CpxII ko vs. CpxII ko+CpxII wt	-38.81	-76.40 to -1.218	Yes	*	0.0405
									CpxII ko vs. CpxII ko+CpxII 1-115	-56.76	-95.02 to -18.51	Yes	**	0.0013
				Minimum	14.36	40.74	44.61	41.03	CpxII ko vs. CpxIIko+CpxI 1-115 amph.helix	-44.95	-81.95 to -7.955	Yes	*	0.0112
				25% Percentile	27.22	55	53.42	51.83	CpxII ko+CpxII wt vs. CpxII ko+CpxII 1-115	-17.95	-56.21 to 20.30	No	ns	0.6027
				Median	40.48	75.8	97.04	91.31	CpxII ko+CpxII wt vs. CpxIIko+CpxI 1-115 amph.helix	-6.146	-43.14 to 30.85	No	ns	0.9713
				75% Percentile	58.26	93.38	149.3	117.7	CpxII ko+CpxII 1-115 vs. CpxIIko+CpxI 1-115 amph.helix	11.81	-25.86 to 49.48	No	ns	0.84
				Maximum	94.67	194.6	180	153.7
				Mean	45.16	83.97	101.9	90.12
				Std. Deviation	22.34	41.17	51.04	36.57
				Std. Error of Mean	5.768	10.63	13.64	9.143
				Lower 95% CI	32.79	61.17	72.46	70.63
				Upper 95% CI	57.54	106.8	131.4	109.6

## Sheet: Fig. 1C SR
Figure	Parameter	Statistical Test	P-value	Parameter	CpxII ko	CpxII ko+CpxII wt	CpxII ko+CpxII 1-115	CpxIIko+CpxI 1-115 amph.helix	Dunn's multiple comparisons test	Mean rank diff.	Significant?	Summary	Adjusted P Value
Fig. 1C	SR	Kruskal-Wallis test	0.2445	Number of values	15	15	14	16	CpxII ko vs. CpxII ko+CpxII wt	11.73	No	ns	0.3947
									CpxII ko vs. CpxII ko+CpxII 1-115	0.9571	No	ns	>0.9999
				Minimum	11.69	4.097	3.778	5.808	CpxII ko vs. CpxIIko+CpxI 1-115 amph.helix	3.538	No	ns	>0.9999
				25% Percentile	14.08	7.998	13.01	11.85	CpxII ko+CpxII wt vs. CpxII ko+CpxII 1-115	-10.78	No	ns	0.5809
				Median	26.16	13.59	25.62	21.16	CpxII ko+CpxII wt vs. CpxIIko+CpxI 1-115 amph.helix	-8.196	No	ns	>0.9999
				75% Percentile	30.5	28.92	34.95	34.19	CpxII ko+CpxII 1-115 vs. CpxIIko+CpxI 1-115 amph.helix	2.58	No	ns	>0.9999
				Maximum	78.28	36.28	62.98	70.45
				Mean	27.29	17.28	26.66	25.1
				Std. Deviation	16.35	11.07	16.28	17.46
				Std. Error of Mean	4.222	2.858	4.352	4.366
				Lower 95% CI	18.24	11.15	17.26	15.8
				Upper 95% CI	36.34	23.41	36.06	34.41
				Mean ranks	34.6	22.87	33.64	31.06

## Sheet: Fig.1D_tauRRP
Figure	Parameter	Statistical Test	P-value	Group	CpxII ko	CpxII ko+CpxII wt	CpxII ko+CpxII 1-115	CpxIIko+CpxI 1-115 amph.helix	Dunn's multiple comparisons test	Mean rank diff.	Significant?	Summary	Adjusted P Value
Fig. 1D	Tau RRP	Kruskal-Wallis test	0.0004	Number of values	11	15	14	16	CpxII ko vs. CpxII ko+CpxII wt	19.68	Yes	*	0.0142
									CpxII ko vs. CpxII ko+CpxII 1-115	23.32	Yes	**	0.0023
				Minimum	20.51	10.06	5.266	7.404	CpxII ko vs. CpxIIko+CpxI 1-115 amph.helix	25.26	Yes	***	0.0005
				25% Percentile	22.65	13.18	9.256	11.99	CpxII ko+CpxII wt vs. CpxII ko+CpxII 1-115	3.633	No	ns	>0.9999
				Median	48.46	19.68	14.04	16.12	CpxII ko+CpxII wt vs. CpxIIko+CpxI 1-115 amph.helix	5.571	No	ns	>0.9999
				75% Percentile	78.38	22.91	27.94	20.73	CpxII ko+CpxII 1-115 vs. CpxIIko+CpxI 1-115 amph.helix	1.938	No	ns	>0.9999
				Maximum	176.3	40.43	36.27	28.42
				Mean	63.58	19.92	18.35	16.67
				Std. Deviation	55.21	8.069	10.16	6.046
				Std. Error of Mean	16.65	2.083	2.716	1.511
				Lower 95% CI	26.5	15.45	12.48	13.45
				Upper 95% CI	100.7	24.38	24.22	19.89
				Mean ranks	46.82	27.13	23.5	21.56

## Sheet: Fig. 1D_tau SRP
Figure	Parameter	Statistical Test	P-value	Group	CpxII ko	CpxII ko+CpxII wt	CpxII ko+CpxII 1-115	CpxIIko+CpxI 1-115 amph.helix	Dunn's multiple comparisons test	Mean rank diff.	Significant?	Summary	Adjusted P Value
Fig. 1 D	tau SRP	Kruskal-Wallis test	0.9854	Number of values	15	15	12	14	CpxII ko vs. CpxII ko+CpxII wt	2.267	No	ns	>0.9999
									CpxII ko vs. CpxII ko+CpxII 1-115	0.7833	No	ns	>0.9999
				Minimum	45.3	89.01	104.7	56.11	CpxII ko vs. CpxIIko+CpxI 1-115 amph.helix	1.033	No	ns	>0.9999
				25% Percentile	104	162.6	170.8	171.3	CpxII ko+CpxII wt vs. CpxII ko+CpxII 1-115	-1.483	No	ns	>0.9999
				Median	244.9	185.8	213.7	239.2	CpxII ko+CpxII wt vs. CpxIIko+CpxI 1-115 amph.helix	-1.233	No	ns	>0.9999
				75% Percentile	356.5	375.9	334.9	281.1	CpxII ko+CpxII 1-115 vs. CpxIIko+CpxI 1-115 amph.helix	0.25	No	ns	>0.9999
				Maximum	778	599.1	370.9	410.4
				Mean	283.4	246.7	235.9	221
				Std. Deviation	211.7	138.6	91.77	87.19
				Std. Error of Mean	54.66	35.78	26.49	23.3
				Lower 95% CI	166.2	170	177.5	180.6
				Upper 95% CI	400.6	323.5	294.2	281.3
				Mean ranks	29.53	27.27	28.75	28.5

## Sheet: Fig. 1D_delay 
Figure	Parameter	Statistical Test	P-value	Parameter	CpxII ko	CpxII ko+CpxII wt	CpxII ko+CpxII 1-115	CpxIIko+CpxI 1-115 amph.helix	Dunn's multiple comparisons test	Mean rank diff.	Significant?	Summary	Adjusted P Value
Fig. 1D	delay	Kruskal-Wallis test	<0.0001	Number of values	15	15	13	16	CpxII ko vs. CpxII ko+CpxII wt	23.87	Yes	***	0.0008
									CpxII ko vs. CpxII ko+CpxII 1-115	25.08	Yes	***	0.0007
				Minimum	4.798	1.004	1.902	0.9862	CpxII ko vs. CpxIIko+CpxI 1-115 amph.helix	36.4	Yes	****	<0.0001
				25% Percentile	13.22	2.968	2.386	1.476	CpxII ko+CpxII wt vs. CpxII ko+CpxII 1-115	1.215	No	ns	>0.9999
				Median	21	4.197	3.201	2.367	CpxII ko+CpxII wt vs. CpxIIko+CpxI 1-115 amph.helix	12.54	No	ns	0.2535
				75% Percentile	31.43	4.74	5.839	2.713	CpxII ko+CpxII 1-115 vs. CpxIIko+CpxI 1-115 amph.helix	11.32	No	ns	0.465
				Maximum	42.43	7.769	6.393	9.289
				Mean	22.85	3.901	3.85	2.58
				Std. Deviation	11.79	1.673	1.715	1.908
				Std. Error of Mean	3.044	0.432	0.4756	0.477
				Lower 95% CI	16.32	2.975	2.814	1.563
				Upper 95% CI	29.38	4.827	4.887	3.596
				Mean ranks	51.47	27.6	26.38	15.06

## Sheet: Fig. 1F
Figure	Parameter	Statistical Test	P-value	Parameter	CpxII ko	CpxII ko+CpxII	CpxII ko+CpxII 1-115	CpxIIko+CpxI 1-115 amph.helix	Tukey's multiple comparisons test	Mean Diff.	95.00% CI of diff.	Below threshold?	Summary	Adjusted P Value
Fig. 1 F	premature secretion	one-way Anova	<0.0001	Number of values	15	14	14	16	CpxII ko vs. CpxII ko+CpxII	24.76	13.99 to 35.53	Yes	****	<0.0001
									CpxII ko vs. CpxII ko+CpxII 1-115	8.994	-1.775 to 19.76	No	ns	0.1324
				Minimum	5.638	-28.21	-0.8086	-9.86	CpxII ko vs. CpxIIko+CpxI 1-115 amph.helix	25.79	15.21 to 36.38	Yes	****	<0.0001
				25% Percentile	14.63	-8.285	5.46	-7.755	CpxII ko+CpxII vs. CpxII ko+CpxII 1-115	-15.77	-26.72 to -4.813	Yes	**	0.0019
				Median	19.35	0.4934	11.44	-1.611	CpxII ko+CpxII vs. CpxIIko+CpxI 1-115 amph.helix	1.035	-9.734 to 11.80	No	ns	0.9941
				75% Percentile	30.31	7.448	26.55	3.177	CpxII ko+CpxII 1-115 vs. CpxIIko+CpxI 1-115 amph.helix	16.8	6.032 to 27.57	Yes	***	0.0007
				Maximum	48.17	15.86	40.05	8.4
				Mean	23.57	-1.187	14.58	-2.221
				Std. Deviation	12.41	11.58	12.44	6.216
				Std. Error of Mean	3.204	3.095	3.326	1.605
				Lower 95% CI	16.7	-7.872	7.393	-5.664
				Upper 95% CI	30.44	5.499	21.76	1.221
