# Supplementary material for: Key determinants of the dual clamp/activator function of Complexin
Source: eLife. 2024 Nov 25;12:RP92438. doi: 10.7554/eLife.92438 (PMC11589869; doi:10.7554/eLife.92438)
Supplement: Figure 2—figure supplement 1—source data 1. [file elife-92438-fig2-figsupp1-data1.xlsx]

## Sheet: Fig. 2 Suppl.1 A
Figure	Parameter	Statistical Test	P-value	Parameter	cpxIIko	cpxIIko+cpxII	cpxIIko+cpxII L124E-L128E	Dunn's multiple comparisons test	Mean rank diff.	Significant?	Summary	Adjusted P Value
Fig. 2 Suppl_1A	tauRRP	Kruskal-Wallis test	<0.0001	Number of values	25	25	26	cpxIIko vs. cpxIIko+cpxII	20.44	Yes	**	0.0032
								cpxIIko vs. cpxIIko+cpxII L124E-L128E	18.11	Yes	*	0.0102
				Minimum	5.155	8.319	5.482	cpxIIko+cpxII vs. cpxIIko+cpxII L124E-L128E	-2.328	No	ns	>0.9999
				25% Percentile	19.72	12.27	11.52
				Median	42.65	15.33	17.04
				75% Percentile	82.82	22.5	31.26
				Maximum	258.6	40	71.5
				Mean	61.15	18.31	21.66
				Std. Deviation	57.31	8.679	14.23
				Std. Error of Mean	11.46	1.736	2.791
				Lower 95% CI	37.49	14.73	15.91
				Upper 95% CI	84.8	21.89	27.41
				Mean ranks	51.42	30.98	33.31
Figure	Parameter	Statistical Test	P-value	Parameter	cpxIIko	cpxIIko+cpxII	cpxIIko+cpxII L124E-L128E	Dunn's multiple comparisons test	Mean rank diff.	Significant?	Summary	Adjusted P Value
Fig. 2 Suppl_1A	tauSRP	Kruskal-Wallis test	<0.0001	Number of values	25	25	26	cpxIIko vs. cpxIIko+cpxII	7.84	No	ns	0.6282
								cpxIIko vs. cpxIIko+cpxII L124E-L128E	14.74	No	ns	0.0516
				Minimum	101.2	137.9	71.49	cpxIIko+cpxII vs. cpxIIko+cpxII L124E-L128E	6.895	No	ns	0.7949
				25% Percentile	202	221.8	189.4
				Median	340.2	264.2	233.4
				75% Percentile	521.4	351	314.8
				Maximum	1069	490.2	633.9
				Mean	391	288.9	258.3
				Std. Deviation	241.7	99.55	112.6
				Std. Error of Mean	48.34	19.91	22.08
				Lower 95% CI	291.2	247.8	212.8
				Upper 95% CI	490.8	330	303.7
				Mean ranks	46.12	38.28	31.38
Figure	Parameter	Statistical Test	P-value	Parameter	cpxIIko	cpxIIko+cpxII	cpxIIko+cpxII L124E-L128E	Dunn's multiple comparisons test	Mean rank diff.	Significant?	Summary	Adjusted P Value
Fig. 2 Suppl_1A	delay	Kruskal-Wallis test	<0.0001	Number of values	25	25	26	cpxIIko vs. cpxIIko+cpxII	42.32	Yes	****	<0.0001
								cpxIIko vs. cpxIIko+cpxII L124E-L128E	24.14	Yes	***	0.0003
				Minimum	3.521	0.1482	1.05	cpxIIko+cpxII vs. cpxIIko+cpxII L124E-L128E	-18.18	Yes	**	0.0099
				25% Percentile	9.446	1.352	2.899
				Median	14.4	2.033	4.366
				75% Percentile	21.4	3.018	7.497
				Maximum	66.01	5.404	15.34
				Mean	18.46	2.297	5.302
				Std. Deviation	15.59	1.333	3.402
				Std. Error of Mean	3.118	0.2665	0.6672
				Lower 95% CI	12.02	1.747	3.928
				Upper 95% CI	24.9	2.847	6.676
				Mean ranks	60.68	18.36	36.54

## Sheet: Fig. 2 Suppl.1 B
Figure	Parameter	Statistical Test	P-value	Parameters	CpxII ko	CpxII ko +CpxII wt	CpxII ko +CpxII L124WL128W		Dunn's multiple comparisons test	Mean rank diff.	Significant?	Summary	Adjusted P Value
Fig. 2 sup1 B	Tau RRP	Kruskal-Wallis test	P = <0.001	Number of values	13	15	11		CpxII ko vs. CpxII ko +CpxII wt	17.16	Yes	***	0.0002
									CpxII ko vs. CpxII ko +CpxII L124WL128W	16.41	Yes	**	0.0013
				Minimum	12.87	8.319	10.2		CpxII ko +CpxII wt vs. CpxII ko +CpxII L124WL128W	-0.7515	No	ns	>0.9999
				25% Percentile	18.58	10.89	10.95
				Median	32.71	12.04	12.42
				75% Percentile	133.9	15.14	16.36
				Maximum	140.8	22.44	21.72
				Mean	63.81	13.2	13.77
				Std. Deviation	53.31	3.496	3.701
				Std. Error of Mean	14.79	0.9027	1.116
				Lower 95% CI	31.59	11.27	11.28
				Upper 95% CI	96.02	15.14	16.25
				Mean ranks	31.23	14.07	14.82
Figure	Parameter	Statistical Test	P-value	Parameters	CpxII ko	CpxII ko+CpxII wt	CpxII ko +CpxII L124WL128W		Dunn's multiple comparisons test	Mean rank diff.	Significant?	Summary	Adjusted P Value
Fig. 2 sup1 B	tau SRP	Kruskal-Wallis test	0.9631	Number of values	18	14	12		CpxII ko vs. CpxII ko+CpxII wt	-0.04945	No	ns	>0.9999
									CpxII ko vs. CpxII ko +CpxII L124WL128W	1.058	No	ns	>0.9999
				Minimum	153.8	147.3	194.9		CpxII ko+CpxII wt vs. CpxII ko +CpxII L124WL128W	1.107	No	ns	>0.9999
				25% Percentile	274.9	269.3	256
				Median	338.9	365.2	317.3
				75% Percentile	466.2	506.1	551.6
				Maximum	770.4	979.6	946.3
				Mean	397.8	409.5	401.8
				Std. Deviation	180.7	204.5	218.3
				Std. Error of Mean	50.11	54.66	63
				Lower 95% CI	288.7	291.4	263.1
				Upper 95% CI	507	527.5	540.4
				Mean ranks	20.31	20.36	19.25
Figure	Parameter	Statistical Test	P-value	Parameters	CpxII ko	CpxII ko +CpxII wt	CpxII ko +CpxII L124WL128W		Dunn's multiple comparisons test	Mean rank diff.	Significant?	Summary	Adjusted P Value
Fig. 2 sup1 B	delay	Kruskal-Wallis test	<0.0001	Number of values	17	15	12		CpxII ko vs. CpxII ko +CpxII wt	24.67	Yes	****	<0.0001
									CpxII ko vs. CpxII ko +CpxII L124WL128W	18.67	Yes	***	0.0003
				Minimum	4.224	0.1482	0.8865		CpxII ko +CpxII wt vs. CpxII ko +CpxII L124WL128W	-6	No	ns	0.6834
				25% Percentile	8.336	0.8788	1.253
				Median	10.46	1.048	1.92
				75% Percentile	14.34	1.793	2.191
				Maximum	32.47	4.134	3.004
				Mean	11.68	1.42	1.828
				Std. Deviation	6.458	0.9457	0.6096
				Std. Error of Mean	1.566	0.2442	0.176
				Lower 95% CI	8.359	0.8967	1.441
				Upper 95% CI	15	1.944	2.216
				Mean ranks	36	11.33	17.33
