# Supplementary material for: Key determinants of the dual clamp/activator function of Complexin
Source: eLife. 2024 Nov 25;12:RP92438. doi: 10.7554/eLife.92438 (PMC11589869; doi:10.7554/eLife.92438)
Supplement: Figure 2—figure supplement 2—source data 1. [file elife-92438-fig2-figsupp2-data1.xlsx]

## Sheet: Fig. 2 Supl. 2 C
Figure	Parameter	Statistical Test	P-value	Parameters	CpxII ko	CpxII ko +CpxII wt	CpxII ko +CpxII L124W-L128W	CpxII ko +CpxII L124E-L128E	Dunn's multiple comparisons test	Mean rank diff.	Significant?	Summary	Adjusted P Value
Fig. 2 Suppl. 2 B	RRP	Kruskal-Wallis test	<0.0001	Number of values	24	25	14	25
									cpxIIko vs. cpxIIko+cpxII	-44.51	Yes	****	<0.0001
				Minimum	5	37.04	77.02	5	cpxIIko vs. cpxIIko+cpxII_L117W-L121W	-44.68	Yes	****	<0.0001
				25% Percentile	17.75	112.8	141.1	22.58	cpxIIko vs. cpxIIko+cpxII_L117E-L121E	-8.79	No	ns	>0.9999
				Median	29.17	178.6	159.1	45	cpxIIko+cpxII vs. cpxIIko+cpxII_L117W-L121W	-0.1686	No	ns	>0.9999
				75% Percentile	46.4	289.2	280	75.72	cpxIIko+cpxII vs. cpxIIko+cpxII_L117E-L121E	35.72	Yes	****	<0.0001
				Maximum	80	593.1	597.3	175.5	cpxIIko+cpxII_L117W-L121W vs. cpxIIko+cpxII_L117E-L121E	35.89	Yes	***	0.0002
				Mean	33.6	210.8	209.6	54.27
				Std. Deviation	18.63	131.2	134.8	44.32
				Std. Error of Mean	3.803	26.24	36.04	8.863
				Lower 95% CI	25.73	156.7	131.8	35.98
				Upper 95% CI	41.46	265	287.5	72.56
				Mean ranks	22.25	66.76	66.93	31.04
Figure	Parameter	Statistical Test	P-value	Parameters	CpxII ko	CpxII ko +CpxII wt	CpxII ko +CpxII L124W-L128W	CpxII ko +CpxII L124E-L128E	Tukey's multiple comparisons test	Mean Diff.	95.00% CI of diff.	Below threshold?	Summary	Adjusted P Value
Fig. 2 Suppl. 2 B	SRP	ANOVA	<0.0001	Number of values	26	25	14	25	cpxIIko vs. cpxIIko+cpxII	-113.6	-164.7 to -62.40	Yes	****	<0.0001
									cpxIIko vs. cpxIIko+cpxII_L117W-L121W	-127.2	-187.7 to -66.66	Yes	****	<0.0001
				Minimum	19.24	89.76	38.37	30.7	cpxIIko vs. cpxIIko+cpxII_L117E-L121E	-95.34	-146.5 to -44.19	Yes	****	<0.0001
				25% Percentile	48.57	130.1	117.5	102.9	cpxIIko+cpxII vs. cpxIIko+cpxII_L117W-L121W	-13.65	-74.60 to 47.31	No	ns	0.9359
				Median	69.23	181	196.4	164.1	cpxIIko+cpxII vs. cpxIIko+cpxII_L117E-L121E	18.21	-33.44 to 69.86	No	ns	0.7922
				75% Percentile	98.12	234	294.9	200	cpxIIko+cpxII_L117W-L121W vs. cpxIIko+cpxII_L117E-L121E	31.86	-29.10 to 92.82	No	ns	0.522
				Maximum	145.5	359.4	350.6	327.8
				Mean	73.64	187.2	200.8	169
				Std. Deviation	36.33	69.15	98.61	77.36
				Std. Error of Mean	7.125	13.83	26.36	15.47
				Lower 95% CI	58.97	158.7	143.9	137.1
				Upper 95% CI	88.32	215.7	257.8	200.9
Figure	Parameter	Statistical Test	P-value	Parameters	CpxII ko	CpxII ko +CpxII wt	CpxII ko +CpxII L124W-L128W	CpxII ko +CpxII L124E-L128E	Dunn's multiple comparisons test	Mean rank diff.	Significant?	Summary	Adjusted P Value
Fig. 2 Suppl. 2 B	SR	Kruskal-Wallis test	<0.0001	Number of values	26	25	14	25
				Minimum	0.606	-2.232	2.586	-5.005	cpxIIko vs. cpxIIko+cpxII	21.48	Yes	*	0.02
				25% Percentile	10.21	5.597	4.717	4.742	cpxIIko vs. cpxIIko+cpxII_L117W-L121W	28.38	Yes	**	0.0063
				Median	19.25	9.089	6.139	7.667	cpxIIko vs. cpxIIko+cpxII_L117E-L121E	18	No	ns	0.0833
				75% Percentile	31.42	12.85	9.554	20.43	cpxIIko+cpxII vs. cpxIIko+cpxII_L117W-L121W	6.9	No	ns	>0.9999
				Maximum	43.64	39.35	20.47	40.32	cpxIIko+cpxII vs. cpxIIko+cpxII_L117E-L121E	-3.48	No	ns	>0.9999
									cpxIIko+cpxII_L117W-L121W vs. cpxIIko+cpxII_L117E-L121E	-10.38	No	ns	>0.9999
				Mean	20.46	9.918	8.159	12.68
				Std. Deviation	12.32	7.855	5.606	12.9
				Std. Error of Mean	2.417	1.571	1.498	2.579
				Lower 95% CI	15.48	6.676	4.922	7.361
				Upper 95% CI	25.44	13.16	11.4	18.01
				Mean ranks	60.88	39.4	32.5	42.88

## Sheet: Fig. 2 Supl. 2 D
Figure	Parameter	Statistical Test	P-value	Parameters	CpxII ko	CpxII ko +CpxII wt	CpxII ko +CpxII L124W-L128W	CpxII ko +CpxII L124E-L128E	Dunn's multiple comparisons test	Mean rank diff.	Significant?	Summary	Adjusted P Value
Fig. 2 Suppl. 2 C	tau RRP	Kruskal-Wallis test	<0.0001	Number of values	24	25	14	25	cpxIIko vs. cpxIIko+cpxII	24.02	Yes	**	0.006
									cpxIIko vs. cpxIIko+cpxII_L117W-L121W	27.61	Yes	**	0.0079
				Minimum	12.04	4.292	8.369	6.305	cpxIIko vs. cpxIIko+cpxII_L117E-L121E	9.942	No	ns	>0.9999
				25% Percentile	27.96	20.42	12.37	23.22	cpxIIko+cpxII vs. cpxIIko+cpxII_L117W-L121W	3.591	No	ns	>0.9999
				Median	50.19	23.72	24.56	37.61	cpxIIko+cpxII vs. cpxIIko+cpxII_L117E-L121E	-14.08	No	ns	0.3081
				75% Percentile	144.4	29.7	33.38	49.32	cpxIIko+cpxII_L117W-L121W vs. cpxIIko+cpxII_L117E-L121E	-17.67	No	ns	0.2295
				Maximum	442.8	78.17	37.89	66.67
				Mean	102.2	27.22	23.59	36.57
				Std. Deviation	120.1	14.96	10.47	17.55
				Std. Error of Mean	24.52	2.992	2.799	3.51
				Lower 95% CI	51.53	21.04	17.55	29.33
				Upper 95% CI	153	33.39	29.64	43.82
				Mean ranks	58.54	34.52	30.93	48.6
Figure	Parameter	Statistical Test	P-value	Parameters	CpxII ko	CpxII ko +CpxII wt	CpxII ko +CpxII L124W-L128W	CpxII ko +CpxII L124E-L128E	Tukey's multiple comparisons test	Mean Diff.	95.00% CI of diff.	Below threshold?	Summary	Adjusted P Value
Fig. 2 Suppl. 2 C	tau SRP	ANOVA	0.3381	Number of values	26	25	14	25	cpxIIko vs. cpxIIko+cpxII	-6.618	-146.0 to 132.8	No	ns	0.9993
									cpxIIko vs. cpxIIko+cpxII_L117W-L121W	-33.95	-198.9 to 131.0	No	ns	0.9492
				Minimum	125.4	141	223.9	101.8	cpxIIko vs. cpxIIko+cpxII_L117E-L121E	69.02	-70.38 to 208.4	No	ns	0.5672
				25% Percentile	243.1	267	245.6	183.7	cpxIIko+cpxII vs. cpxIIko+cpxII_L117W-L121W	-27.33	-193.5 to 138.8	No	ns	0.973
				Median	329	358.6	346.2	243.7	cpxIIko+cpxII vs. cpxIIko+cpxII_L117E-L121E	75.64	-65.13 to 216.4	No	ns	0.498
				75% Percentile	493.7	426.3	534	362.3	cpxIIko+cpxII_L117W-L121W vs. cpxIIko+cpxII_L117E-L121E	103	-63.16 to 269.1	No	ns	0.3707
				Maximum	757	905.2	864.4	1246
				Mean	369.9	376.5	403.9	300.9
				Std. Deviation	172	179.4	185.5	218.3
				Std. Error of Mean	33.73	35.89	49.58	43.66
				Lower 95% CI	300.5	302.5	296.8	210.8
				Upper 95% CI	439.4	450.6	511	391
Figure	Parameter	Statistical Test	P-value	Parameters	CpxII ko	CpxII ko +CpxII wt	CpxII ko +CpxII L124W-L128W	CpxII ko +CpxII L124E-L128E	Dunn's multiple comparisons test	Mean rank diff.	Significant?	Summary	Adjusted P Value
Fig. 2 Suppl. 2 C	delay	Kruskal-Wallis test	<0.0001	Number of values	26	25	14	25	cpxIIko vs. cpxIIko+cpxII	50.69	Yes	****	<0.0001
									cpxIIko vs. cpxIIko+cpxII_L117W-L121W	49.37	Yes	****	<0.0001
				Minimum	5.368	-0.7507	0.4379	-14.64	cpxIIko vs. cpxIIko+cpxII_L117E-L121E	24.85	Yes	**	0.004
				25% Percentile	14.04	1.612	1.189	3.895	cpxIIko+cpxII vs. cpxIIko+cpxII_L117W-L121W	-1.326	No	ns	>0.9999
				Median	19.45	2.099	2.702	5.637	cpxIIko+cpxII vs. cpxIIko+cpxII_L117E-L121E	-25.84	Yes	**	0.0018
				75% Percentile	38.47	3.188	4.034	8.117	cpxIIko+cpxII_L117W-L121W vs. cpxIIko+cpxII_L117E-L121E	-24.51	Yes	*	0.0219
				Maximum	108	5.873	4.844	26.41
				Mean	32.01	2.373	2.565	6.756
				Std. Deviation	25.32	1.296	1.395	7.499
				Std. Error of Mean	5.28	0.2592	0.3729	1.5
				Lower 95% CI	19.06	1.838	1.759	3.661
				Upper 95% CI	40.96	2.908	3.371	9.851
				Mean ranks	73.65	22.96	24.29	48.8

## Sheet: Fig. 2 Supl. 2 F
Figure	Parameter	Statistical Test	P-value	Parameters	CpxII ko	CpxII ko +CpxII wt	CpxII ko +CpxII L124W-L128W	CpxII ko +CpxII L124E-L128E	Dunn's multiple comparisons test	Mean rank diff.	Significant?	Summary	Adjusted P Value
Fig. 2 Suppl. 2 F	prerelease [DCM]	Kruskal-Wallis test	<0.0001	Number of values	26	25	14	24	cpxIIko vs. cpxIIko+cpxII	44.4	Yes	****	<0.0001
									cpxIIko vs. cpxIIko+cpxII_L117W-L121W	45.24	Yes	****	<0.0001
				Minimum	-3.866	-19.59	-18.91	-0.6731	cpxIIko vs. cpxIIko+cpxII_L117E-L121E	6.635	No	ns	>0.9999
				25% Percentile	17.02	-5.804	-9.16	9.052	cpxIIko+cpxII vs. cpxIIko+cpxII_L117W-L121W	0.8386	No	ns	>0.9999
				Median	24.98	-1.177	0.0022	15.01	cpxIIko+cpxII vs. cpxIIko+cpxII_L117E-L121E	-37.77	Yes	****	<0.0001
				75% Percentile	36.81	3.502	2.394	33.26	cpxIIko+cpxII_L117W-L121W vs. cpxIIko+cpxII_L117E-L121E	-38.61	Yes	****	<0.0001
				Maximum	69.44	12.19	6.846	47.81
				Mean	28.23	-1.723	-2.931	20.89
				Std. Deviation	17.37	7.003	7.342	15.08
				Std. Error of Mean	3.407	1.348	1.962	3.078
				Lower 95% CI	21.21	-4.493	-7.17	14.52
				Upper 95% CI	35.24	1.047	1.308	27.25
				Mean ranks	67.88	23.48	22.64	61.25
