# Supplementary material for: Key determinants of the dual clamp/activator function of Complexin
Source: eLife. 2024 Nov 25;12:RP92438. doi: 10.7554/eLife.92438 (PMC11589869; doi:10.7554/eLife.92438)
Supplement: Figure 2—figure supplement 3—source data 1. [file elife-92438-fig2-figsupp3-data1.xlsx]

## Sheet: Fig. 2 Suppl 3 C
Figure	Parameter	Statistical Test	P-value	Parameter	cpxIIko	cpxIIko+cpxII	cpxIIko+cpxII_K133A	cpxIIko+cpxII_D130A	cpxIIko+cpxII_D118A	cpxIIko+cpxII_Q129A	Dunn's multiple comparisons test	Mean rank diff.	Significant?	Summary	Adjusted P Value
Fig. 2 Suppl 3 C	RRP	Kruskal-Wallis test	<0.0001	Number of values	42	58	17	15	17	19	cpxIIko vs. cpxIIko+cpxII	-82.77	Yes	****	<0.0001
											cpxIIko vs. cpxIIko+cpxII_K133A	-73.07	Yes	****	<0.0001
				Minimum	0	47.75	41.95	53.76	36.99	90	cpxIIko vs. cpxIIko+cpxII_D130A	-83.73	Yes	****	<0.0001
				25% Percentile	11.5	110.4	75.99	92.09	63.54	128.1	cpxIIko vs. cpxIIko+cpxII_D118A	-70.77	Yes	****	<0.0001
				Median	16.79	150.9	140.7	152.9	91.58	155.9	cpxIIko vs. cpxIIko+cpxII_Q129A	-92.75	Yes	****	<0.0001
				75% Percentile	30.75	190.8	203.9	230.3	225.3	256	cpxIIko+cpxII vs. cpxIIko+cpxII_K133A	9.702	No	ns	>0.9999
				Maximum	100.1	458	282.6	388.2	435.4	408.4	cpxIIko+cpxII vs. cpxIIko+cpxII_D130A	-0.9609	No	ns	>0.9999
											cpxIIko+cpxII vs. cpxIIko+cpxII_D118A	12	No	ns	>0.9999
				Mean	23.05	169.1	142.8	169.1	156.2	190.4	cpxIIko+cpxII vs. cpxIIko+cpxII_Q129A	-9.985	No	ns	>0.9999
				Std. Deviation	20.77	88.62	73.03	89.01	119.9	85.81	cpxIIko+cpxII_K133A vs. cpxIIko+cpxII_D130A	-10.66	No	ns	>0.9999
				Std. Error of Mean	3.205	11.64	17.71	22.98	29.09	19.69	cpxIIko+cpxII_K133A vs. cpxIIko+cpxII_D118A	2.294	No	ns	>0.9999
											cpxIIko+cpxII_K133A vs. cpxIIko+cpxII_Q129A	-19.69	No	ns	>0.9999
				Lower 95% CI	16.57	145.8	105.3	119.8	94.53	149.1	cpxIIko+cpxII_D130A vs. cpxIIko+cpxII_D118A	12.96	No	ns	>0.9999
				Upper 95% CI	29.52	192.5	180.4	218.4	217.8	231.8	cpxIIko+cpxII_D130A vs. cpxIIko+cpxII_Q129A	-9.025	No	ns	>0.9999
											cpxIIko+cpxII_D118A vs. cpxIIko+cpxII_Q129A	-21.98	No	ns	>0.9999
				Mean ranks	23.4	106.2	96.47	107.1	94.18	116.2
Figure	Parameter	Statistical Test	P-value	Parameter	cpxIIko	cpxIIko+cpxII	cpxIIko+cpxII_K133A	cpxIIko+cpxII_D130A	cpxIIko+cpxII_D118A	cpxIIko+cpxII_Q129A	Dunn's multiple comparisons test	Mean rank diff.	Significant?	Summary	Adjusted P Value
Fig. 2 Suppl 3 C	SRP	Kruskal-Wallis test	<0.0001	Number of values	42	58	17	15	17	19	cpxIIko vs. cpxIIko+cpxII	-42	Yes	***	0.0003
											cpxIIko vs. cpxIIko+cpxII_K133A	-45.5	Yes	*	0.0171
				Minimum	16.76	35.43	36.43	82.23	71.9	44.83	cpxIIko vs. cpxIIko+cpxII_D130A	-32.23	No	ns	0.4138
				25% Percentile	66.79	103.6	103.5	99.37	130.3	93.64	cpxIIko vs. cpxIIko+cpxII_D118A	-59.44	Yes	***	0.0003
				Median	97.68	132.9	156.5	135.7	171.8	117.7	cpxIIko vs. cpxIIko+cpxII_Q129A	-17.71	No	ns	>0.9999
				75% Percentile	125.5	199.2	203.7	148.1	216.7	146	cpxIIko+cpxII vs. cpxIIko+cpxII_K133A	-3.5	No	ns	>0.9999
				Maximum	309.1	508.5	362.3	205.7	388.6	201.8	cpxIIko+cpxII vs. cpxIIko+cpxII_D130A	9.767	No	ns	>0.9999
											cpxIIko+cpxII vs. cpxIIko+cpxII_D118A	-17.44	No	ns	>0.9999
				Mean	103.4	162.1	161.4	131.2	180.5	119.3	cpxIIko+cpxII vs. cpxIIko+cpxII_Q129A	24.29	No	ns	0.8832
				Std. Deviation	57.38	87.97	86.58	33.49	76.3	37.97	cpxIIko+cpxII_K133A vs. cpxIIko+cpxII_D130A	13.27	No	ns	>0.9999
				Std. Error of Mean	8.854	11.55	21	8.646	18.51	8.711	cpxIIko+cpxII_K133A vs. cpxIIko+cpxII_D118A	-13.94	No	ns	>0.9999
											cpxIIko+cpxII_K133A vs. cpxIIko+cpxII_Q129A	27.79	No	ns	>0.9999
				Lower 95% CI	85.55	139	116.9	112.6	141.2	101	cpxIIko+cpxII_D130A vs. cpxIIko+cpxII_D118A	-27.21	No	ns	>0.9999
				Upper 95% CI	121.3	185.2	205.9	149.7	219.7	137.6	cpxIIko+cpxII_D130A vs. cpxIIko+cpxII_Q129A	14.52	No	ns	>0.9999
											cpxIIko+cpxII_D118A vs. cpxIIko+cpxII_Q129A	41.73	No	ns	0.1526
				Mean ranks	54.5	96.5	100	86.73	113.9	72.21
Figure	Parameter	Statistical Test	P-value	Parameter	cpxIIko	cpxIIko+cpxII	cpxIIko+cpxII_K133A	cpxIIko+cpxII_D130A	cpxIIko+cpxII_D118A	cpxIIko+cpxII_Q129A	Dunn's multiple comparisons test	Mean rank diff.	Significant?	Summary	Adjusted P Value
Fig. 2 Suppl 3 C	SR	Kruskal-Wallis test	0.001	Number of values	42	58	17	15	17	19	cpxIIko vs. cpxIIko+cpxII	39.19	Yes	**	0.001
											cpxIIko vs. cpxIIko+cpxII_K133A	35.04	No	ns	0.1831
				Minimum	-3.046	-33.32	-2.616	-13.59	-4.944	-0.0539	cpxIIko vs. cpxIIko+cpxII_D130A	16.05	No	ns	>0.9999
				25% Percentile	8.416	-0.008125	2.398	5.282	-0.05405	3.597	cpxIIko vs. cpxIIko+cpxII_D118A	33.57	No	ns	0.2453
				Median	13.87	6.593	9.263	12.8	9.662	5.996	cpxIIko vs. cpxIIko+cpxII_Q129A	44.61	Yes	*	0.0136
				75% Percentile	24	11.33	10.1	16.81	13.92	8.6	cpxIIko+cpxII vs. cpxIIko+cpxII_K133A	-4.153	No	ns	>0.9999
				Maximum	51.18	38.4	23.04	24.63	22.52	13.24	cpxIIko+cpxII vs. cpxIIko+cpxII_D130A	-23.14	No	ns	>0.9999
											cpxIIko+cpxII vs. cpxIIko+cpxII_D118A	-5.624	No	ns	>0.9999
				Mean	15.78	6.707	7.774	10.07	7.813	6.041	cpxIIko+cpxII vs. cpxIIko+cpxII_Q129A	5.417	No	ns	>0.9999
				Std. Deviation	12.09	11.09	6.757	9.203	8.263	3.954	cpxIIko+cpxII_K133A vs. cpxIIko+cpxII_D130A	-18.99	No	ns	>0.9999
				Std. Error of Mean	1.866	1.456	1.639	2.376	2.004	0.907	cpxIIko+cpxII_K133A vs. cpxIIko+cpxII_D118A	-1.471	No	ns	>0.9999
											cpxIIko+cpxII_K133A vs. cpxIIko+cpxII_Q129A	9.57	No	ns	>0.9999
				Lower 95% CI	12.01	3.79	4.3	4.971	3.564	4.135	cpxIIko+cpxII_D130A vs. cpxIIko+cpxII_D118A	17.52	No	ns	>0.9999
				Upper 95% CI	19.55	9.624	11.25	15.16	12.06	7.946	cpxIIko+cpxII_D130A vs. cpxIIko+cpxII_Q129A	28.56	No	ns	>0.9999
											cpxIIko+cpxII_D118A vs. cpxIIko+cpxII_Q129A	11.04	No	ns	>0.9999
				Mean ranks	111.5	72.26	76.41	95.4	77.88	66.84

## Sheet: Fig. 2 Suppl 3 D
Figure	Parameter	Statistical Test	P-value	Parameter	cpxIIko	cpxIIko+cpxII	cpxIIko+cpxII_K133A	cpxIIko+cpxII_D130A	cpxIIko+cpxII_D118A	cpxIIko+cpxII_Q129A	Dunn's multiple comparisons test	Mean rank diff.	Significant?	Summary	Adjusted P Value
Fig. 2 Suppl 3 D	tauRRP	Kruskal-Wallis test	<0.0001	Number of values	40	58	17	15	17	19	cpxIIko vs. cpxIIko+cpxII	60.45	Yes	****	<0.0001
											cpxIIko vs. cpxIIko+cpxII_K133A	48.99	Yes	**	0.0065
				Minimum	7.534	3.76	5.392	6.964	4.659	3.962	cpxIIko vs. cpxIIko+cpxII_D130A	65.43	Yes	***	0.0001
				25% Percentile	19.82	10.22	11.18	9.111	7.581	9.529	cpxIIko vs. cpxIIko+cpxII_D118A	64.93	Yes	****	<0.0001
				Median	36.7	13.61	15.16	10.82	12.03	12.82	cpxIIko vs. cpxIIko+cpxII_Q129A	61.38	Yes	****	<0.0001
				75% Percentile	93.53	15.77	18.84	15.36	19.49	16.85	cpxIIko+cpxII vs. cpxIIko+cpxII_K133A	-11.46	No	ns	>0.9999
				Maximum	400.2	30.46	28.23	30.3	27.65	22.94	cpxIIko+cpxII vs. cpxIIko+cpxII_D130A	4.976	No	ns	>0.9999
											cpxIIko+cpxII vs. cpxIIko+cpxII_D118A	4.482	No	ns	>0.9999
				Mean	70.13	13.66	15.22	14.37	13.29	13.35	cpxIIko+cpxII vs. cpxIIko+cpxII_Q129A	0.9338	No	ns	>0.9999
				Std. Deviation	81.36	4.921	5.968	7.909	6.512	5.122	cpxIIko+cpxII_K133A vs. cpxIIko+cpxII_D130A	16.44	No	ns	>0.9999
				Std. Error of Mean	12.86	0.6462	1.447	2.042	1.579	1.175	cpxIIko+cpxII_K133A vs. cpxIIko+cpxII_D118A	15.94	No	ns	>0.9999
											cpxIIko+cpxII_K133A vs. cpxIIko+cpxII_Q129A	12.39	No	ns	>0.9999
				Lower 95% CI	44.11	12.37	12.15	9.987	9.944	10.88	cpxIIko+cpxII_D130A vs. cpxIIko+cpxII_D118A	-0.4941	No	ns	>0.9999
				Upper 95% CI	96.15	14.96	18.29	18.75	16.64	15.82	cpxIIko+cpxII_D130A vs. cpxIIko+cpxII_Q129A	-4.042	No	ns	>0.9999
											cpxIIko+cpxII_D118A vs. cpxIIko+cpxII_Q129A	-3.548	No	ns	>0.9999
				Mean ranks	129.2	68.78	80.24	63.8	64.29	67.84
Figure	Parameter	Statistical Test	P-value	Parameter	cpxIIko	cpxIIko+cpxII	cpxIIko+cpxII_K133A	cpxIIko+cpxII_D130A	cpxIIko+cpxII_D118A	cpxIIko+cpxII_Q129A	Dunn's multiple comparisons test	Mean rank diff.	Significant?	Summary	Adjusted P Value
Fig. 2 Suppl 3 D	tauRRP	Kruskal-Wallis test	0.0049	Number of values	41	58	17	15	17	19	cpxIIko vs. cpxIIko+cpxII	14.2	No	ns	>0.9999
											cpxIIko vs. cpxIIko+cpxII_K133A	-5.973	No	ns	>0.9999
				Minimum	145.2	61.88	252.1	118.5	118.6	89.83	cpxIIko vs. cpxIIko+cpxII_D130A	33.84	No	ns	0.3058
				25% Percentile	322.2	233.7	298.8	250.2	332.3	169.6	cpxIIko vs. cpxIIko+cpxII_D118A	-5.267	No	ns	>0.9999
				Median	416.3	331.6	453.9	296.9	465.3	275.6	cpxIIko vs. cpxIIko+cpxII_Q129A	40.54	Yes	*	0.0377
				75% Percentile	538.6	606.8	597.4	344.3	542.3	362.4	cpxIIko+cpxII vs. cpxIIko+cpxII_K133A	-20.17	No	ns	>0.9999
				Maximum	911.3	1229	982.8	721.6	827.7	633	cpxIIko+cpxII vs. cpxIIko+cpxII_D130A	19.64	No	ns	>0.9999
											cpxIIko+cpxII vs. cpxIIko+cpxII_D118A	-19.46	No	ns	>0.9999
				Mean	439.9	430	472.7	315.3	459.7	290.9	cpxIIko+cpxII vs. cpxIIko+cpxII_Q129A	26.35	No	ns	0.5891
				Std. Deviation	184.8	277.1	198	130.3	189.2	140.9	cpxIIko+cpxII_K133A vs. cpxIIko+cpxII_D130A	39.81	No	ns	0.3017
				Std. Error of Mean	28.86	36.39	48.01	33.65	45.9	32.32	cpxIIko+cpxII_K133A vs. cpxIIko+cpxII_D118A	0.7059	No	ns	>0.9999
											cpxIIko+cpxII_K133A vs. cpxIIko+cpxII_Q129A	46.52	No	ns	0.0593
				Lower 95% CI	381.6	357.1	371	243.2	362.4	223	cpxIIko+cpxII_D130A vs. cpxIIko+cpxII_D118A	-39.11	No	ns	0.3364
				Upper 95% CI	498.2	502.9	574.5	387.5	557	358.8	cpxIIko+cpxII_D130A vs. cpxIIko+cpxII_Q129A	6.705	No	ns	>0.9999
											cpxIIko+cpxII_D118A vs. cpxIIko+cpxII_Q129A	45.81	No	ns	0.0681
				Mean ranks	95.44	81.24	101.4	61.6	100.7	54.89
Figure	Parameter	Statistical Test	P-value	Parameter	cpxIIko	cpxIIko+cpxII	cpxIIko+cpxII_K133A	cpxIIko+cpxII_D130A	cpxIIko+cpxII_D118A	cpxIIko+cpxII_Q129A	Dunn's multiple comparisons test	Mean rank diff.	Significant?	Summary	Adjusted P Value
Fig. 2 Suppl 3 D	delay	Kruskal-Wallis test	<0.0001	Number of values	41	58	17	15	17	19	cpxIIko vs. cpxIIko+cpxII	73.29	Yes	****	<0.0001
											cpxIIko vs. cpxIIko+cpxII_K133A	60.69	Yes	***	0.0002
				Minimum	-2.966	0.713	1.118	0.3709	1.029	1.661	cpxIIko vs. cpxIIko+cpxII_D130A	103.6	Yes	****	<0.0001
				25% Percentile	5.268	1.784	1.735	1.53	2.25	1.944	cpxIIko vs. cpxIIko+cpxII_D118A	47.46	Yes	*	0.01
				Median	9.247	2.072	2.36	1.716	2.69	2.43	cpxIIko vs. cpxIIko+cpxII_Q129A	48.97	Yes	**	0.0039
				75% Percentile	18.51	2.694	3.082	1.853	3.245	3.923	cpxIIko+cpxII vs. cpxIIko+cpxII_K133A	-12.6	No	ns	>0.9999
				Maximum	68.45	4.188	7.262	2.068	4.739	5.084	cpxIIko+cpxII vs. cpxIIko+cpxII_D130A	30.32	No	ns	0.4562
											cpxIIko+cpxII vs. cpxIIko+cpxII_D118A	-25.83	No	ns	0.7913
				Mean	14.23	2.18	2.722	1.627	2.787	2.966	cpxIIko+cpxII vs. cpxIIko+cpxII_Q129A	-24.32	No	ns	0.8566
				Std. Deviation	15.73	0.7587	1.475	0.4232	0.8478	1.147	cpxIIko+cpxII_K133A vs. cpxIIko+cpxII_D130A	42.91	No	ns	0.1835
				Std. Error of Mean	2.457	0.09962	0.3578	0.1093	0.2056	0.2631	cpxIIko+cpxII_K133A vs. cpxIIko+cpxII_D118A	-13.24	No	ns	>0.9999
											cpxIIko+cpxII_K133A vs. cpxIIko+cpxII_Q129A	-11.72	No	ns	>0.9999
				Lower 95% CI	9.265	1.98	1.963	1.393	2.351	2.413	cpxIIko+cpxII_D130A vs. cpxIIko+cpxII_D118A	-56.15	Yes	*	0.0157
				Upper 95% CI	19.2	2.379	3.48	1.862	3.223	3.518	cpxIIko+cpxII_D130A vs. cpxIIko+cpxII_Q129A	-54.64	Yes	*	0.0161
											cpxIIko+cpxII_D118A vs. cpxIIko+cpxII_Q129A	1.514	No	ns	>0.9999
				Mean ranks	135.3	62.05	74.65	31.73	87.88	86.37

## Sheet: Fig. 2 Suppl 3 F
Figure	Parameter	Statistical Test	P-value	Parameter	cpxIIko	cpxIIko+cpxII	cpxIIko+cpxII_K133A	cpxIIko+cpxII_D130A	cpxIIko+cpxII_D118A	cpxIIko+cpxII_Q129A	Dunn's multiple comparisons test	Mean rank diff.	Significant?	Summary	Adjusted P Value
Fig. 2 Suppl 3 F	premature secretion	Kruskal-Wallis test	<0.0001	Number of values	42	58	17	15	17	21	cpxIIko vs. cpxIIko+cpxII	71.95	Yes	****	<0.0001
											cpxIIko vs. cpxIIko+cpxII_K133A	83.25	Yes	****	<0.0001
				Minimum	-1.279	-22.6	-7.836	-2.938	-6.976	-21.97	cpxIIko vs. cpxIIko+cpxII_D130A	62.83	Yes	***	0.0003
				25% Percentile	11.4	-3.418	-2.612	-1.042	-2.173	-3.465	cpxIIko vs. cpxIIko+cpxII_D118A	85.49	Yes	****	<0.0001
				Median	24.75	0.9013	-1.271	2.398	-1.221	0.0993	cpxIIko vs. cpxIIko+cpxII_Q129A	80.67	Yes	****	<0.0001
				75% Percentile	38.9	6.185	1.885	4.678	1.828	3.951	cpxIIko+cpxII vs. cpxIIko+cpxII_K133A	11.31	No	ns	>0.9999
				Maximum	76.95	31.3	9.549	8.584	8.886	9.667	cpxIIko+cpxII vs. cpxIIko+cpxII_D130A	-9.117	No	ns	>0.9999
											cpxIIko+cpxII vs. cpxIIko+cpxII_D118A	13.54	No	ns	>0.9999
				Mean	26.23	1.738	-0.1227	2.271	-0.4994	-0.8992	cpxIIko+cpxII vs. cpxIIko+cpxII_Q129A	8.721	No	ns	>0.9999
				Std. Deviation	16.92	9.511	4.47	3.494	3.554	7.411	cpxIIko+cpxII_K133A vs. cpxIIko+cpxII_D130A	-20.42	No	ns	>0.9999
				Std. Error of Mean	2.611	1.249	1.084	0.902	0.8619	1.617	cpxIIko+cpxII_K133A vs. cpxIIko+cpxII_D118A	2.235	No	ns	>0.9999
											cpxIIko+cpxII_K133A vs. cpxIIko+cpxII_Q129A	-2.585	No	ns	>0.9999
				Lower 95% CI	20.96	-0.7624	-2.421	0.3361	-2.326	-4.273	cpxIIko+cpxII_D130A vs. cpxIIko+cpxII_D118A	22.66	No	ns	>0.9999
				Upper 95% CI	31.51	4.239	2.176	4.205	1.328	2.474	cpxIIko+cpxII_D130A vs. cpxIIko+cpxII_Q129A	17.84	No	ns	>0.9999
											cpxIIko+cpxII_D118A vs. cpxIIko+cpxII_Q129A	-4.821	No	ns	>0.9999
				Mean ranks	142.4	70.48	59.18	79.6	56.94	61.76
