# Supplementary material for: Key determinants of the dual clamp/activator function of Complexin
Source: eLife. 2024 Nov 25;12:RP92438. doi: 10.7554/eLife.92438 (PMC11589869; doi:10.7554/eLife.92438)
Supplement: Figure 2—figure supplement 4—source data 1. [file elife-92438-fig2-figsupp4-data1.xlsx]

## Sheet: Fig. 2 Suppl.4 C
Figure	Parameter	Statistical Test	P-value	Parameter	cpxIIko	cpxIIko+cpxII	cpxIIko+cpxII D118K-D130K	Dunn's multiple comparisons test	Mean rank diff.	Significant?	Summary	Adjusted P Value
Fig. 2 Suppl.4C	RRP	Kruskal-Wallis test	<0.0001	Number of values	25	29	14	cpxIIko vs. cpxIIko + cpxII	-34.14	Yes	****	<0.0001
								cpxIIko vs. cpxIIko + cpxII D118K-D130K	-32.73	Yes	****	<0.0001
				Minimum	8.051	66.5	59	cpxIIko + cpxII vs. cpxIIko + cpxII D118K-D130K	1.416	No	ns	>0.9999
				25% Percentile	14.57	106.3	118.9
				Median	20	150	139.3
				75% Percentile	40.95	225.6	211.8
				Maximum	80	353.2	368.1
				Mean	29.08	173.6	163.2
				Std. Deviation	18	82.31	76.79
				Std. Error of Mean	3.599	15.28	20.52
				Lower 95% CI	21.65	142.3	118.9
				Upper 95% CI	36.51	204.9	207.6
				Mean ranks	13.2	47.34	45.93
Figure	Parameter	Statistical Test	P-value	Parameter	cpxIIko	cpxIIko+cpxII	cpxIIko+cpxII D118K-D130K	Dunn's multiple comparisons test	Mean rank diff.	Significant?	Summary	Adjusted P Value
Fig. 2 Suppl.4C	SRP	Kruskal-Wallis test	0.1987	Number of values	27	29	14	cpxIIko vs. cpxIIko + cpxII	-8.638	No	ns	0.3374
								cpxIIko vs. cpxIIko + cpxII D118K-D130K	-9.607	No	ns	0.4552
				Minimum	25.89	38.47	86.72	cpxIIko + cpxII vs. cpxIIko + cpxII D118K-D130K	-0.9692	No	ns	>0.9999
				25% Percentile	64.8	91.65	104.5
				Median	106.8	125.4	121.4
				75% Percentile	133.9	155.8	141.4
				Maximum	215.5	202.9	251.9
				Mean	104.3	123.3	129.8
				Std. Deviation	45.87	41.76	42.5
				Std. Error of Mean	8.828	7.754	11.36
				Lower 95% CI	86.17	107.5	105.2
				Upper 95% CI	122.5	139.2	154.3
Figure	Parameter	Statistical Test	P-value	Parameter	cpxIIko	cpxIIko+cpxII	cpxIIko+cpxII D118K-D130K	Tukey's multiple comparisons test	Mean Diff.	95.00% CI of diff.	Below threshold?	Summary	Adjusted P Value
Fig. 2 Suppl.4C	SR	ANOVA	0.6233	Number of values	27	29	14	cpxIIko vs. cpxIIko + cpxII	1.896	-6.528 to 10.32	No	ns	0.8522
								cpxIIko vs. cpxIIko + cpxII D118K-D130K	4.175	-6.199 to 14.55	No	ns	0.6017
				Minimum	-9.415	-11.83	-4.664	cpxIIko + cpxII vs. cpxIIko + cpxII D118K-D130K	2.279	-7.972 to 12.53	No	ns	0.8555
				25% Percentile	3.79	6.054	6.256
				Median	15.33	13.27	11.74
				75% Percentile	22.81	23.08	19.11
				Maximum	55.85	39.86	32.54
				Mean	15.79	13.89	11.62
				Std. Deviation	15.67	11.93	9.599
				Std. Error of Mean	3.017	2.215	2.565
				Lower 95% CI	9.589	9.356	6.073
				Upper 95% CI	21.99	18.43	17.16

## Sheet: Fig. 2 Suppl.4 D
Figure	Parameter	Statistical Test	P-value	Parameter	cpxIIko	cpxIIko+cpxII	cpxIIko+cpxII D118K-D130K	Dunn's multiple comparisons test	Mean rank diff.	Significant?	Summary	Adjusted P Value
Fig. 2 Suppl.4D	tauRRP	Kruskal-Wallis test	0.0002	Number of values	25	29	14	cpxIIko vs. cpxIIko + cpxII	21.81	Yes	***	0.0002
								cpxIIko vs. cpxIIko + cpxII D118K-D130K	17.47	Yes	*	0.0244
				Minimum	5.935	5.034	6.952	cpxIIko + cpxII vs. cpxIIko + cpxII D118K-D130K	-4.342	No	ns	>0.9999
				25% Percentile	12.84	9.14	9.886
				Median	86.12	11.32	11.7
				75% Percentile	149.8	13.11	14.24
				Maximum	275.2	21.63	22.39
				Mean	93.5	11.24	12.56
				Std. Deviation	88.69	3.545	4.109
				Std. Error of Mean	17.74	0.6582	1.098
				Lower 95% CI	56.89	9.894	10.19
				Upper 95% CI	130.1	12.59	14.93
				Mean ranks	47.4	25.59	29.93
Figure	Parameter	Statistical Test	P-value	Parameter	cpxIIko	cpxIIko+cpxII	cpxIIko+cpxII D118K-D130K	Tukey's multiple comparisons test	Mean Diff.	95.00% CI of diff.	Below threshold?	Summary	Adjusted P Value
Fig. 2 Suppl.4D	tauSRP	ANOVA	0.0006	Number of values	27	29	14	cpxIIko vs. cpxIIko + cpxII	174.1	68.46 to 279.8	Yes	***	0.0006
								cpxIIko vs. cpxIIko + cpxII D118K-D130K	138.5	8.391 to 268.6	Yes	*	0.0343
				Minimum	93.95	107.9	152.1	cpxIIko + cpxII vs. cpxIIko + cpxII D118K-D130K	-35.61	-164.2 to 92.97	No	ns	0.7852
				25% Percentile	293.5	174.7	269.6
				Median	427.4	257.2	306.1
				75% Percentile	575.2	346.4	364.6
				Maximum	1128	749	424.7
				Mean	448.3	274.2	309.8
				Std. Deviation	220.1	131	78.72
				Std. Error of Mean	42.36	24.32	21.04
				Lower 95% CI	361.2	224.4	264.3
				Upper 95% CI	535.4	324	355.3
Figure	Parameter	Statistical Test	P-value	Parameter	cpxIIko	cpxIIko+cpxII	cpxIIko+cpxII D118K-D130K	Dunn's multiple comparisons test	Mean rank diff.	Significant?	Summary	Adjusted P Value
Fig. 2 Suppl.4D	delay	Kruskal-Wallis test	<0.0001	Number of values	27	29	14	cpxIIko vs. cpxIIko + cpxII	24.69	Yes	****	<0.0001
								cpxIIko vs. cpxIIko + cpxII D118K-D130K	23.77	Yes	**	0.0012
				Minimum	-10.54	0.4086	-0.2084	cpxIIko + cpxII vs. cpxIIko + cpxII D118K-D130K	-0.9212	No	ns	>0.9999
				25% Percentile	4.444	0.743	0.603
				Median	5.986	1.053	1.266
				75% Percentile	21.71	1.608	1.914
				Maximum	69.47	2.881	2.739
				Mean	13.38	1.206	1.299
				Std. Deviation	17.63	0.6206	0.8671
				Std. Error of Mean	3.392	0.1152	0.2317
				Lower 95% CI	6.406	0.9699	0.7984
				Upper 95% CI	20.35	1.442	1.8
				Mean ranks	50.48	25.79	26.71

## Sheet: Fig. 2 Suppl.4 F
Figure	Parameter	Statistical Test	P-value	Parameters	CpxII ko	CpxII ko +CpxII wt	cpxIIko+cpxII D118K-D130K	Tukey's multiple comparisons test	Mean Diff.	95.00% CI of diff.	Below threshold?	Summary	Adjusted P Value
Fig. 2 Suppl 4F	prerelease	one way ANOVA	<0.0001	Number of values	27	28	14	cpxIIko vs. cpxIIko + cpxII	27.11	17.77 to 36.46	Yes	****	<0.0001
								cpxIIko vs. cpxIIko + cpxII D118K-D130K	25.03	13.62 to 36.44	Yes	****	<0.0001
				Minimum	-1.886	-7.329	-2.364	cpxIIko + cpxII vs. cpxIIko + cpxII D118K-D130K	-2.086	-13.43 to 9.257	No	ns	0.8986
				25% Percentile	13.46	-1.589	0.8143
				Median	33.39	3.196	5.326
				75% Percentile	43.36	9.521	15.38
				Maximum	93.26	26.58	16.68
				Mean	32.16	5.044	7.13
				Std. Deviation	20.49	9.023	7.159
				Std. Error of Mean	3.944	1.705	1.913
				Lower 95% CI	24.05	1.545	2.996
				Upper 95% CI	40.27	8.543	11.26
				Lower 95% CI	14.04	9.781	14.88
				Upper 95% CI	35.83	20.6	30.09
