# Supplementary material for: Key determinants of the dual clamp/activator function of Complexin
Source: eLife. 2024 Nov 25;12:RP92438. doi: 10.7554/eLife.92438 (PMC11589869; doi:10.7554/eLife.92438)
Supplement: Figure 2—source data 1. [file elife-92438-fig2-data1.xlsx]

## Sheet: Fig. 2 B
Figure	Parameter	Statistical Test	P-value	Parameter	cpxIIko	cpxIIko+cpxII	cpxIIko+cpxII L124E-L128E	Dunn's multiple comparisons test	Mean rank diff.	Significant?	Summary	Adjusted P Value
Fig. 2B	RRP	Kruskal-Wallis test	<0.0001	Number of values	25	25	26	cpxIIko vs. cpxIIko+cpxII	-40.06	Yes	****	<0.0001
								cpxIIko vs. cpxIIko+cpxII L124E-L128E	-12.81	No	ns	0.115
				Minimum	5	52.85	10	cpxIIko+cpxII vs. cpxIIko+cpxII L124E-L128E	27.25	Yes	****	<0.0001
				25% Percentile	10	132.3	23.06
				Median	17.53	175	38.95
				75% Percentile	44.1	330.9	95.5
				Maximum	80.07	652.4	401.6
				Mean	29.12	236.4	72.65
				Std. Deviation	24.1	152.1	90.89
				Std. Error of Mean	4.82	30.42	17.82
				Lower 95% CI	19.17	173.6	35.94
				Upper 95% CI	39.07	299.1	109.4
				Mean ranks	20.94	61	33.75
Figure	Parameter	Statistical Test	P-value	Parameter	cpxIIko	cpxIIko+cpxII	cpxIIko+cpxII L124E-L128E	Tukey's multiple comparisons test	Mean Diff.	95.00% CI of diff.	Below threshold?	Summary	Adjusted P Value
Fig. 2B	SRP	ANOVA	<0.0001	Number of values	25	25	26	cpxIIko vs. cpxIIko+cpxII	-82.6	-120.8 to -44.42	Yes	****	<0.0001
								cpxIIko vs. cpxIIko+cpxII L124E-L128E	-48.26	-86.07 to -10.44	Yes	**	0.0088
				Minimum	19.47	53.04	41.53	cpxIIko+cpxII vs. cpxIIko+cpxII L124E-L128E	34.34	-3.469 to 72.15	No	ns	0.0827
				25% Percentile	60.43	137.3	93.84
				Median	76.66	162.4	135
				75% Percentile	126	201.8	194.7
				Maximum	233.5	336.2	234.5
				Mean	90.7	173.3	139
				Std. Deviation	46.75	61.62	59.6
				Std. Error of Mean	9.35	12.32	11.69
				Lower 95% CI	71.4	147.9	114.9
				Upper 95% CI	110	198.7	163
Figure	Parameter	Statistical Test	P-value	Parameter	cpxIIko	cpxIIko+cpxII	cpxIIko+cpxII L124E-L128E	Tukey's multiple comparisons test	Mean Diff.	95.00% CI of diff.	Below threshold?	Summary	Adjusted P Value
Fig. 2B	SR	ANOVA	<0.0001	Number of values	25	25	26	cpxIIko vs. cpxIIko+cpxII	11.25	2.500 to 20.01	Yes	**	0.0082
								cpxIIko vs. cpxIIko+cpxII L124E-L128E	0.7032	-7.967 to 9.373	No	ns	0.9795
				Minimum	0	-6.278	-1.696	cpxIIko+cpxII vs. cpxIIko+cpxII L124E-L128E	-10.55	-19.22 to -1.881	Yes	*	0.0131
				25% Percentile	4.77	2.989	10.53
				Median	16.66	6.996	15.98
				75% Percentile	26.31	11.19	23.04
				Maximum	74.64	28.34	49.76
				Mean	18.77	7.513	18.06
				Std. Deviation	16.34	7.635	13.29
				Std. Error of Mean	3.267	1.527	2.606
				Lower 95% CI	12.02	4.362	12.7
				Upper 95% CI	25.51	10.66	23.43

## Sheet: Fig. 2C
Figure	Parameter	Statistical Test	P-value	Parameter	cpxIIko	cpxIIko+cpxII	cpxIIko+cpxII L124E-L128E	Tukey's multiple comparisons test	Mean Diff.	95.00% CI of diff.	Below threshold?	Summary	Adjusted P Value
Fig. 2C	premature secretion	ANOVA	<0.0001	Number of values	26	25	26	cpxIIko vs. cpxIIko+cpxII	30.85	21.43 to 40.26	Yes	****	<0.0001
								cpxIIko vs. cpxIIko+cpxII L124E-L128E	8.47	-0.8495 to 17.79	No	ns	0.0824
				Minimum	1.544	-21.18	1.449	cpxIIko+cpxII vs. cpxIIko+cpxII L124E-L128E	-22.38	-31.79 to -12.96	Yes	****	<0.0001
				25% Percentile	19.19	-3.401	14.33
				Median	34.02	1.123	22.69
				75% Percentile	43.25	7.036	32.5
				Maximum	95.1	24.44	50.8
				Mean	32.08	1.237	23.61
				Std. Deviation	19.81	8.73	10.9
				Std. Error of Mean	3.885	1.746	2.137
				Lower 95% CI	24.08	-2.367	19.21
				Upper 95% CI	40.08	4.84	28.01

## Sheet: Fig. 2E
Figure	Parameter	Statistical Test	P-value	Parameters	CpxII ko	CpxII ko +CpxII wt	CpxII ko +CpxII L124WL128W		Tukey's multiple comparisons test	Mean Diff.	95.00% CI of diff.	Below threshold?	Summary	Adjusted P Value
Fig. 2E	RRP	one way ANOVA	<0.0001	Number of values	18	15	12		CpxII ko vs. CpxII ko +CpxII wt	-136.7	-179.2 to -94.18	Yes	****	<0.0001
									CpxII ko vs. CpxII ko +CpxII L124WL128W	-141.7	-187.0 to -96.47	Yes	****	<0.0001
				Minimum	5	89.83	63.15		CpxII ko +CpxII wt vs. CpxII ko +CpxII L124WL128W	-5.022	-51.50 to 41.46	No	ns	0.9627
				25% Percentile	9	103.7	114.3
				Median	20	164.5	170.7
				75% Percentile	47.74	221.7	207.5
				Maximum	67.53	270.2	297.7
				Mean	27.28	164	169
				Std. Deviation	21.23	58.83	63.4
				Std. Error of Mean	5.15	15.19	18.3
				Lower 95% CI	16.36	131.4	128.7
				Upper 95% CI	38.2	196.6	209.3
Figure	Parameter	Statistical Test	P-value	Parameters	CpxII ko	CpxII ko +CpxII wt	CpxII ko +CpxII L124WL128W		Tukey's multiple comparisons test	Mean Diff.	95.00% CI of diff.	Below threshold?	Summary	Adjusted P Value
Fig. 2E	SRP	One way ANOVA	0.327	Number of values	18	15	12		CpxII ko vs. CpxII ko +CpxII wt	-23.39	-64.03 to 17.24	No	ns	0.3505
									CpxII ko vs. CpxII ko +CpxII L124WL128W	-0.9461	-45.43 to 43.54	No	ns	0.9985
				Minimum	20.41	43.42	51		CpxII ko +CpxII wt vs. CpxII ko +CpxII L124WL128W	22.44	-23.70 to 68.58	No	ns	0.47
				25% Percentile	74.32	86.16	74.28
				Median	107.7	137.5	122
				75% Percentile	142.5	168.1	131
				Maximum	233.5	235.6	180
				Mean	111.1	134.5	112.1
				Std. Deviation	49.06	51.51	39.53
				Std. Error of Mean	11.56	13.3	11.92
				Lower 95% CI	86.71	106	85.49
				Upper 95% CI	135.5	163	138.6
Figure	Parameter	Statistical Test	P-value	Parameters	CpxII ko	CpxII ko +CpxII wt	CpxII ko +CpxII L124WL128W		Tukey's multiple comparisons test	Mean Diff.	95.00% CI of diff.	Below threshold?	Summary	Adjusted P Value
Fig. 2E	SR	One way ANOVA	0.2264	Number of values	18	15	12		CpxII ko vs. CpxII ko +CpxII wt	9.742	-4.046 to 23.53	No	ns	0.211
									CpxII ko vs. CpxII ko +CpxII L124WL128W	2.444	-12.25 to 17.14	No	ns	0.9142
				Minimum	-4.836	0	11.19		CpxII ko +CpxII wt vs. CpxII ko +CpxII L124WL128W	-7.298	-22.57 to 7.976	No	ns	0.4829
				25% Percentile	6.77	7.982	13.65
				Median	24.75	13.41	17.35
				75% Percentile	32.96	23.43	30.74
				Maximum	74.64	32.1	50.65
				Mean	24.93	15.19	22.49
				Std. Deviation	21.9	9.768	11.97
				Std. Error of Mean	5.163	2.522	3.455
				Lower 95% CI	14.04	9.781	14.88
				Upper 95% CI	35.83	20.6	30.09

## Sheet: Fig. 2F
Figure	Parameter	Statistical Test	P-value	Parameters	CpxII ko	CpxII ko +CpxII wt	CpxII ko +CpxII L124WL128W		Dunn's multiple comparisons test	Mean rank diff.	Significant?	Summary	Adjusted P Value
Fig. 2F	premature secretion	Kruskal-Wallis test	<0.0001	Number of values	18	15	12		CpxII ko vs. CpxII ko +CpxII wt	18.01	Yes	***	0.0001
									CpxII ko vs. CpxII ko +CpxII L124WL128W	18.49	Yes	***	0.0002
				Minimum	6.356	-1.837	-3.877		CpxII ko +CpxII wt vs. CpxII ko +CpxII L124WL128W	0.4762	No	ns	>0.9999
				25% Percentile	9.774	-0.154	-0.3813
				Median	20.32	1.593	3.595
				75% Percentile	53.09	6.414	6.132
				Maximum	96.62	16.95	10
				Mean	32.68	3.403	2.915
				Std. Deviation	27.49	5.017	4.14
				Std. Error of Mean	7.624	1.341	1.195
				Lower 95% CI	16.07	0.5063	0.2851
				Upper 95% CI	49.3	6.299	5.545
				Mean ranks	32.15	14.14	13.67
