# Supplementary material for: Key determinants of the dual clamp/activator function of Complexin
Source: eLife. 2024 Nov 25;12:RP92438. doi: 10.7554/eLife.92438 (PMC11589869; doi:10.7554/eLife.92438)
Supplement: Figure 3—figure supplement 1—source data 1. [file elife-92438-fig3-figsupp1-data1.xlsx]

## Sheet: Fig. 3 supp.1 B
Figure	Parameter	Statistical Test	P-value	Parameter	CpxII ko	wt	CpxII ko+wt	CpxII ko+L124W-L128W	CpxII ko+L124E-L128E	CpxII ko+ CpxE-A	CpxII ko+Cpx1-115 amph helix	CpxII ko+CpxDN			Dunn's multiple comparisons test	Mean rank diff.	Significant?	Summary	Adjusted P Value
Fig. 3 supp.1	cytosolic fluorescence [AU]	Kruskal-Wallis test	<0.0001	Number of values	25	48	49	22	22	27	27	25			CpxII ko vs. wt	-36.54	Yes	*	0.0366
															CpxII ko vs. CpxII ko+wt	-154	Yes	****	<0.0001
				Minimum	71320	400090	2686305	5828780	4176700	2612080	1895540	6608847			CpxII ko vs. CpxII ko+L124W	-150.3	Yes	****	<0.0001
				25% Percentile	97496	979646	6183978	7179943	6349372	6944585	5558467	7428090			CpxII ko vs. CpxII ko+L124E	-134.9	Yes	****	<0.0001
				Median	142749	1162178	8393415	8191838	7496608	7727525	6445010	8314273			CpxII ko vs. CpxII ko+ CpxE-A	-136.7	Yes	****	<0.0001
				75% Percentile	182174	1439727	10464953	8644878	8642539	8349015	8385340	11542667			CpxII ko vs. CpxII ko+Cpx1-115 amph helix	-126.4	Yes	****	<0.0001
				Maximum	270735	2376958	12513547	9953484	9471090	11304996	16597470	13878747			CpxII ko vs. CpxII ko+CpxDN	-170.8	Yes	****	<0.0001
															wt vs. CpxII ko+wt	-117.5	Yes	****	<0.0001
				Mean	143528	1212428	8219310	7991387	7419292	7538539	7366737	9338547			wt vs. CpxII ko+L124W	-113.7	Yes	****	<0.0001
				Std. Deviation	52013	386626	2505976	1047524	1424151	1570648	3504202	2283582			wt vs. CpxII ko+L124E	-98.37	Yes	****	<0.0001
				Std. Error of Mean	10403	55805	357997	223333	303630	302271	674384	456716			wt vs. CpxII ko+ CpxE-A	-100.1	Yes	****	<0.0001
															wt vs. CpxII ko+Cpx1-115 amph helix	-89.9	Yes	****	<0.0001
				Lower 95% CI	122059	1100164	7499509	7526941	6787859	6917211	5980521	8395931			wt vs. CpxII ko+CpxDN	-134.3	Yes	****	<0.0001
				Upper 95% CI	164998	1324693	8939110	8455833	8050725	8159866	8752953	10281164			CpxII ko+wt vs. CpxII ko+L124W	3.748	No	ns	0.8367
															CpxII ko+wt vs. CpxII ko+L124E	19.11	No	ns	0.2934
				Mean ranks	13	49.54	167	163.3	147.9	149.7	139.4	183.8			CpxII ko+wt vs. CpxII ko+ CpxE-A	17.35	No	ns	0.3069
															CpxII ko+wt vs. CpxII ko+Cpx1-115 amph helix	27.58	No	ns	0.1045
															CpxII ko+wt vs. CpxII ko+CpxDN	-16.82	No	ns	0.3342
															CpxII ko+L124W vs. CpxII ko+L124E	15.36	No	ns	0.4721
															CpxII ko+L124W vs. CpxII ko+ CpxE-A	13.61	No	ns	0.5038
															CpxII ko+L124W vs. CpxII ko+Cpx1-115 amph helix	23.83	No	ns	0.2417
															CpxII ko+L124W vs. CpxII ko+CpxDN	-20.57	No	ns	0.3208
															CpxII ko+L124E vs. CpxII ko+ CpxE-A	-1.758	No	ns	0.9312
															CpxII ko+L124E vs. CpxII ko+Cpx1-115 amph helix	8.465	No	ns	0.6775
															CpxII ko+L124E vs. CpxII ko+CpxDN	-35.93	No	ns	0.0829
															CpxII ko+ CpxE-A vs. CpxII ko+Cpx1-115 amph helix	10.22	No	ns	0.5961
															CpxII ko+ CpxE-A vs. CpxII ko+CpxDN	-34.17	No	ns	0.0823
															CpxII ko+Cpx1-115 amph helix vs. CpxII ko+CpxDN	-44.4	Yes	*	0.024
