# Supplementary material for: Key determinants of the dual clamp/activator function of Complexin
Source: eLife. 2024 Nov 25;12:RP92438. doi: 10.7554/eLife.92438 (PMC11589869; doi:10.7554/eLife.92438)
Supplement: Figure 4—source data 1. [file elife-92438-fig4-data1.xlsx]

## Sheet: Fig. 4C
Figure	Parameter	Statistical Test	P-value	Parameter	wt	cpxIIko	cpxIIko+wt	cpxIIko+EA	Dunn's multiple comparisons test	Mean rank diff.	Significant?	Summary	Adjusted P Value
Fig. 4C	RRP	Kruskal-Wallis test	<0.0001	Number of values	18	19	17	24	wt vs. cpxIIko	27.84	Yes	**	0.0011
									wt vs. cpxIIko+wt	-16.67	No	ns	0.1774
				Minimum	30	1	65.51	5.842	wt vs. cpxIIko+EA	-0.6597	No	ns	>0.9999
				25% Percentile	60.03	2.96	96.37	74.35	cpxIIko vs. cpxIIko+wt	-44.51	Yes	****	<0.0001
				Median	81.49	25	132.5	89.09	cpxIIko vs. cpxIIko+EA	-28.5	Yes	***	0.0003
				75% Percentile	110	31.39	184.2	118.3	cpxIIko+wt vs. cpxIIko+EA	16.01	No	ns	0.1547
				Maximum	350	77	450	204.5
				Mean	98.39	26.42	150.2	89.5
				Std. Deviation	71.01	24.36	90.83	46.01
				Std. Error of Mean	16.74	5.589	22.03	9.392
				Lower 95% CI	63.08	14.68	103.5	70.08
				Upper 95% CI	133.7	38.16	196.9	108.9
				Mean ranks	42.44	14.61	59.12	43.1
Figure	Parameter	Statistical Test	P-value	Parameter	wt	cpxIIko	cpxIIko+wt	cpxIIko+EA	Dunn's multiple comparisons test	Mean rank diff.	Significant?	Summary	Adjusted P Value
Fig. 4C	SRP	Kruskal-Wallis test	<0.0001	Number of values	18	19	17	24	wt vs. cpxIIko	30.76	Yes	***	0.0002
									wt vs. cpxIIko+wt	3.147	No	ns	>0.9999
				Minimum	22.83	17.24	17.49	29.52	wt vs. cpxIIko+EA	5.917	No	ns	>0.9999
				25% Percentile	57.53	24.13	50.09	49.94	cpxIIko vs. cpxIIko+wt	-27.62	Yes	**	0.0016
				Median	78.87	38.36	86.08	69.66	cpxIIko vs. cpxIIko+EA	-24.85	Yes	**	0.0021
				75% Percentile	117.1	47.86	114.6	100.9	cpxIIko+wt vs. cpxIIko+EA	2.77	No	ns	>0.9999
				Maximum	165.2	100.9	196.2	138.9
				Mean	86.74	39.82	84.19	75.24
				Std. Deviation	38.91	19.96	44.46	33.28
				Std. Error of Mean	9.171	4.579	10.78	6.793
				Lower 95% CI	67.39	30.21	61.33	61.19
				Upper 95% CI	106.1	49.44	107	89.29
				Mean ranks	49.5	18.74	46.35	43.58
Figure	Parameter	Statistical Test	P-value	Parameter	wt	cpxIIko	cpxIIko+wt	cpxIIko+EA	Tukey's multiple comparisons test	Mean Diff.	95.00% CI of diff.	Below threshold?	Summary	Adjusted P Value
Fig. 4C	SR	one-way Anova	0.259	Number of values	18	19	17	24	wt vs. cpxIIko	4.155	-6.604 to 14.91	No	ns	0.7412
									wt vs. cpxIIko+wt	5.889	-5.174 to 16.95	No	ns	0.5039
				Minimum	4.14	4.925	0.4819	3.52	wt vs. cpxIIko+EA	7.65	-2.549 to 17.85	No	ns	0.2081
				25% Percentile	15.65	11.15	11.6	12.41	cpxIIko vs. cpxIIko+wt	1.734	-9.186 to 12.65	No	ns	0.9753
				Median	25.22	22.44	18.67	16.03	cpxIIko vs. cpxIIko+EA	3.495	-6.549 to 13.54	No	ns	0.7971
				75% Percentile	33.96	33.77	26.1	24.02	cpxIIko+wt vs. cpxIIko+EA	1.761	-8.608 to 12.13	No	ns	0.9701
				Maximum	68.04	39.77	51.51	60.26
				Mean	26.44	22.28	20.55	18.79
				Std. Deviation	14.71	11.62	12.45	11.17
				Std. Error of Mean	3.468	2.666	3.018	2.28
				Lower 95% CI	19.12	16.68	14.15	14.07
				Upper 95% CI	33.75	27.88	26.94	23.5

## Sheet: Fig.4D
Figure	Parameter	Statistical Test	P-value	Group	wt	cpxIIko	cpxIIko+CpxII	cpxIIko+CpxII-EA	Dunn's multiple comparisons test	Mean rank diff.	Significant?	Summary	Adjusted P Value
Fig. 4D	Tau RRP	Kruskal-Wallis test	P = <0.001	Number of values	18	14	15	24	wt vs. cpxIIko	-30.18	Yes	***	0.000244
									wt vs. cpxIIko+CpxII	5.356	No	ns	>0.999999
				Minimum	5.098	22.82	7.798	11.17	wt vs. cpxIIko+CpxII-EA	-12.69	No	ns	0.291287
				25% Percentile	10.84	36.37	10.48	18.19	cpxIIko vs. cpxIIko+CpxII	35.54	Yes	***	2.2e-05
				Median	16.75	47.29	13.55	25.43	cpxIIko vs. cpxIIko+CpxII-EA	17.49	No	ns	0.070512
				75% Percentile	27.06	94.13	20.75	40.46	cpxIIko+CpxII vs. cpxIIko+CpxII-EA	-18.05	Yes	*	0.047304
				Maximum	73.23	106	50.17	106.8
				Mean	21.79	59.74	17.37	34.12
				Std. Deviation	16.86	29.87	10.41	24.66
				Std. Error of Mean	3.974	7.982	2.689	5.033
				Lower 95% CI	13.41	42.49	11.6	23.71
				Upper 95% CI	30.18	76.98	23.14	44.53
				Mean ranks	26.89	57.07	21.53	39.58
Figure	Parameter	Statistical Test	P-value	Group	wt	cpxIIko	cpxIIko+cpxII	cpxIIko+cpxII-EA	Dunn's multiple comparisons test	Mean rank diff.	Significant?	Summary	Adjusted P Value
Fig. 4 D	tau SRP	Kruskal-Wallis test	0.073679	Number of values	18	19	16	24	wt vs. cpxIIko	-4.301	No	ns	>0.999999
									wt vs. cpxIIko+CpxII	-6.285	No	ns	>0.999999
				Minimum	48.5	85.55	54.37	69.29	wt vs. cpxIIko+CpxII-EA	-17.18	No	ns	0.082684
				25% Percentile	100.1	131.4	93.83	145.1	cpxIIko vs. cpxIIko+CpxII	-1.984	No	ns	>0.999999
				Median	137.3	173.5	209.8	247.7	cpxIIko vs. cpxIIko+CpxII-EA	-12.88	No	ns	0.36497
				75% Percentile	275.2	214.7	273.2	401.3	cpxIIko+CpxII vs. cpxIIko+CpxII-EA	-10.9	No	ns	0.787767
				Maximum	532.3	438.1	476.6	4282
				Mean	184.8	189	213.8	477
				Std. Deviation	129.2	92.1	131.4	840.5
				Std. Error of Mean	30.46	21.13	32.85	171.6
				Lower 95% CI	120.5	144.6	143.8	122.1
				Upper 95% CI	249	233.4	283.8	831.9
				Mean ranks	31.28	35.58	37.56	48.46
Figure	Parameter	Statistical Test	P-value	Parameter	wt	cpxIIko	cpxIIko+CpxII	cpxIIko+CpxII-EA	Dunn's multiple comparisons test	Mean rank diff.	Significant?	Summary	Adjusted P Value
Fig. 4D	delay	Kruskal-Wallis test	<0.0001	Number of values	17	18	15	24	wt vs. cpxIIko	-32.68	Yes	****	<0.0001
									wt vs. cpxIIko+CpxII	9.424	No	ns	>0.9999
				Minimum	3.879	7.082	4.18	4.076	wt vs. cpxIIko+CpxII-EA	-11.22	No	ns	0.5992
				25% Percentile	5.488	11.62	4.857	6.536	cpxIIko vs. cpxIIko+CpxII	42.1	Yes	****	<0.0001
				Median	6.689	14.42	5.566	7.295	cpxIIko vs. cpxIIko+CpxII-EA	21.46	Yes	**	0.0082
				75% Percentile	7.448	17.69	6.399	9.096	cpxIIko+CpxII vs. cpxIIko+CpxII-EA	-20.64	Yes	*	0.0213
				Maximum	9.271	23.06	8.845	24.14
				Mean	6.601	14.47	5.776	9.137
				Std. Deviation	1.443	4.381	1.38	5.034
				Std. Error of Mean	0.3499	1.033	0.3562	1.028
				Lower 95% CI	5.859	12.29	5.012	7.011
				Upper 95% CI	7.342	16.65	6.54	11.26
				Mean ranks	27.82	60.5	18.4	39.04

## Sheet: Fig. 4F
Figure	Parameter	Statistical Test	P-value	Parameter	wt	cpxIIko	cpxIIko+wt	cpxIIko+EA	Tukey's multiple comparisons test	Mean Diff.	95.00% CI of diff.	Below threshold?	Summary	Adjusted P Value
Fig. 4 F	premature secretion	one-way Anova	<0.0001	Number of values	14	19	16	25	wt vs. cpxIIko	-15.61	-24.14 to -7.083	Yes	****	<0.0001
									wt vs. cpxIIko+wt	10.62	1.760 to 19.49	Yes	*	0.0124
				Minimum	-6.343	-3.932	-15.42	-20.8	wt vs. cpxIIko+EA	9.634	1.549 to 17.72	Yes	*	0.0131
				25% Percentile	0.01722	11.1	-11.08	-7.014	cpxIIko vs. cpxIIko+wt	26.24	18.02 to 34.45	Yes	****	<0.0001
				Median	3.526	19.21	-3.809	-3.802	cpxIIko vs. cpxIIko+EA	25.25	17.88 to 32.62	Yes	****	<0.0001
				75% Percentile	8.864	31.43	1.866	-0.7387	cpxIIko+wt vs. cpxIIko+EA	-0.9897	-8.744 to 6.764	No	ns	0.9868
				Maximum	30.03	51.75	4.205	5.11
				Mean	5.654	21.27	-4.97	-3.98
				Std. Deviation	10.1	13.31	6.775	5.495
				Std. Error of Mean	2.699	3.054	1.694	1.099
				Lower 95% CI	-0.1767	14.85	-8.58	-6.248
				Upper 95% CI	11.48	27.68	-1.36	-1.712
