# Supplementary material for: Key determinants of the dual clamp/activator function of Complexin
Source: eLife. 2024 Nov 25;12:RP92438. doi: 10.7554/eLife.92438 (PMC11589869; doi:10.7554/eLife.92438)
Supplement: Figure 5—figure supplement 1—source data 1. [file elife-92438-fig5-figsupp1-data1.xlsx]

## Sheet: Fig 5 Suppl. 1
Figure	Parameter	Statistical Test	P-value	Parameter	wt	Syt1ko	cpxIIko	syt1_cpxII dko	syt1ko+cpxII	cpxIIko+cpxII	Tukey's multiple comparisons test	Mean Diff.	95.00% CI of diff.	Below threshold?	Summary	Adjusted P Value
Fig 5 Suppl. 1 B	premature secretion	ANOVA	<0.0001	Number of values	49	46	35	26	22	15	wt vs. sytko	-1.263	-6.277 to 3.751	No	ns	0.9787
											wt vs. cpxIIko	-15.31	-20.78 to -9.847	Yes	****	<0.0001
				Minimum	0.6545	1.758	11.91	6.657	-8.904	-15.71	wt vs. cpxII-syt1 dko	-13.3	-19.29 to -7.313	Yes	****	<0.0001
				25% Percentile	8.124	8.143	20.48	16.87	-0.1175	-8.502	wt vs. syt1ko+cpxII	11.63	5.293 to 17.97	Yes	****	<0.0001
				Median	12.79	14.58	30.66	26.04	1.059	-4.817	wt vs. cpxIIko+cpx	18.63	11.35 to 25.92	Yes	****	<0.0001
				75% Percentile	18.47	21.48	34.76	33.59	5.648	-0.93	sytko vs. cpxIIko	-14.05	-19.54 to -8.561	Yes	****	<0.0001
				Maximum	38.88	36.77	46.76	58.76	11.92	7.021	sytko vs. cpxII-syt1 dko	-12.04	-18.05 to -6.029	Yes	****	<0.0001
											sytko vs. syt1ko+cpxII	12.89	6.535 to 19.25	Yes	****	<0.0001
				Mean	13.84	15.1	29.15	27.15	2.212	-4.789	sytko vs. cpxIIko+cpx	19.89	12.59 to 27.20	Yes	****	<0.0001
				Std. Deviation	7.863	7.765	8.659	13.56	4.698	5.888	cpxIIko vs. cpxII-syt1 dko	2.008	-4.385 to 8.400	No	ns	0.945
				Std. Error of Mean	1.123	1.121	1.464	2.66	1.002	1.52	cpxIIko vs. syt1ko+cpxII	26.94	20.22 to 33.66	Yes	****	<0.0001
											cpxIIko vs. cpxIIko+cpx	33.94	26.32 to 41.56	Yes	****	<0.0001
				Lower 95% CI	11.58	12.85	26.18	21.67	0.1293	-8.05	cpxII-syt1 dko vs. syt1ko+cpxII	24.93	17.78 to 32.09	Yes	****	<0.0001
				Upper 95% CI	16.1	17.36	32.13	32.62	4.295	-1.528	cpxII-syt1 dko vs. cpxIIko+cpx	31.93	23.93 to 39.94	Yes	****	<0.0001
											syt1ko+cpxII vs. cpxIIko+cpx	7.001	-1.266 to 15.27	No	ns	0.1485
Figure	Parameter	Statistical Test	P-value	Parameter	wt	Syt1ko	cpxIIko	syt1_cpxII dko	syt1ko+cpxII	cpxIIko+cpxII	Dunn's multiple comparisons test	Mean rank diff.	Significant?	Summary	Adjusted P Value
Fig 5 Suppl. 1 C	intracellular Calcium (nM)	Kruskal-Wallis test	0.6909	Number of values	49	46	35	26	22	15	wt vs. sytko	3.749	No	ns	>0.9999
											wt vs. cpxIIko	4.563	No	ns	>0.9999
				Minimum	212	260.7	172.5	264.3	260.9	282.8	wt vs. cpxII-syt1 dko	9.596	No	ns	>0.9999
				25% Percentile	384	362.4	317.2	327	300.8	343.3	wt vs. syt1ko+cpxII	18.49	No	ns	>0.9999
				Median	452.4	429.7	420.9	385.7	407.3	509.5	wt vs. cpxIIko+cpx	-7.733	No	ns	>0.9999
				75% Percentile	536.5	544.1	650.9	629.8	473.6	583.7	sytko vs. cpxIIko	0.814	No	ns	>0.9999
				Maximum	852.7	817.2	966.8	874.5	1351	821	sytko vs. cpxII-syt1 dko	5.847	No	ns	>0.9999
											sytko vs. syt1ko+cpxII	14.74	No	ns	>0.9999
				Mean	470.2	458.5	487.9	470.8	450.9	490.3	sytko vs. cpxIIko+cpx	-11.48	No	ns	>0.9999
				Std. Deviation	145.2	130	212.3	189.1	220.9	149.9	cpxIIko vs. cpxII-syt1 dko	5.033	No	ns	>0.9999
				Std. Error of Mean	22.67	18.76	35.89	37.09	41.75	38.7	cpxIIko vs. syt1ko+cpxII	13.93	No	ns	>0.9999
											cpxIIko vs. cpxIIko+cpx	-12.3	No	ns	>0.9999
				Lower 95% CI	424.4	420.7	414.9	394.4	365.2	407.3	cpxII-syt1 dko vs. syt1ko+cpxII	8.896	No	ns	>0.9999
				Upper 95% CI	516	496.2	560.8	547.2	536.6	573.3	cpxII-syt1 dko vs. cpxIIko+cpx	-17.33	No	ns	>0.9999
											syt1ko+cpxII vs. cpxIIko+cpx	-26.22	No	ns	>0.9999
				Mean ranks	102.1	98.39	97.57	92.54	83.64	109.9
Figure	Parameter	Statistical Test	P-value	Parameter	wt	Syt1ko	cpxIIko	syt1_cpxII dko	syt1ko+cpxII	cpxIIko+cpxII	Dunn's multiple comparisons test	Mean rank diff.	Significant?	Summary	Adjusted P Value
Fig 5 Suppl. 1 E	exocytotic burst	Kruskal-Wallis test	<0.0001	Number of values	49	46	35	26	22	15	wt vs. sytko	56.08	Yes	****	<0.0001
											wt vs. cpxIIko	79.2	Yes	****	<0.0001
				Minimum	62.71	10.05	21.05	18.02	47.23	151.4	wt vs. cpxII-syt1 dko	75.92	Yes	****	<0.0001
				25% Percentile	122.2	49.6	45.51	48.79	58.49	188.5	wt vs. syt1ko+cpxII	38.39	No	ns	0.1129
				Median	151.8	83.01	64.21	72.74	111.6	275.6	wt vs. cpxIIko+cpx	-36.4	No	ns	0.4148
				75% Percentile	206.8	136.2	93.94	103	171.5	388.1	sytko vs. cpxIIko	23.12	No	ns	0.9962
				Maximum	426.1	246.6	147.6	135.9	366.2	493.5	sytko vs. cpxII-syt1 dko	19.83	No	ns	>0.9999
											sytko vs. syt1ko+cpxII	-17.69	No	ns	>0.9999
				Mean	172.8	97.05	71.74	73.76	126.8	285.9	sytko vs. cpxIIko+cpx	-92.48	Yes	****	<0.0001
				Std. Deviation	74.62	58.17	34.73	32.77	84.94	111.2	cpxIIko vs. cpxII-syt1 dko	-3.285	No	ns	>0.9999
				Std. Error of Mean	10.55	8.577	5.871	6.427	18.11	28.72	cpxIIko vs. syt1ko+cpxII	-40.81	No	ns	0.1133
											cpxIIko vs. cpxIIko+cpx	-115.6	Yes	****	<0.0001
				Lower 95% CI	151.6	79.77	59.81	60.53	89.16	224.3	cpxII-syt1 dko vs. syt1ko+cpxII	-37.52	No	ns	0.3157
				Upper 95% CI	194	114.3	83.67	87	164.5	347.5	cpxII-syt1 dko vs. cpxIIko+cpx	-112.3	Yes	****	<0.0001
											syt1ko+cpxII vs. cpxIIko+cpx	-74.79	Yes	**	0.001
				Mean ranks	136.8	80.72	57.6	60.88	98.41	173.2
