# Supplementary material for: Key determinants of the dual clamp/activator function of Complexin
Source: eLife. 2024 Nov 25;12:RP92438. doi: 10.7554/eLife.92438 (PMC11589869; doi:10.7554/eLife.92438)
Supplement: Figure 5—figure supplement 2—source data 1. [file elife-92438-fig5-figsupp2-data1.xlsx]

## Sheet: Fig. 5 Suppl_2 B
Figure	Parameter	Statistical Test	P-value	Parameter	wt	syt7ko	syt7ko+cpxII	Dunn's multiple comparisons test	Mean rank diff.	Significant?	Summary	Adjusted P Value
Fig. 5 Suppl. 2 B	RRP	Kruskal-Wallis	0.0004	Number of values	17	18	18	wt vs. syt7ko	17.26	Yes	**	0.0029
								wt vs. syt7ko+cpxII	-0.6307	No	ns	>0.9999
				Minimum	24.96	7.313	27.12	syt7ko vs. syt7ko+cpxII	-17.89	Yes	**	0.0015
				25% Percentile	59.34	24.36	71.12
				Median	78.11	36.74	98.68
				75% Percentile	137.4	67.78	128.4
				Maximum	269.2	136.3	153
				Mean	100.7	46.18	94.54
				Std. Deviation	59.33	31.3	37.63
				Std. Error of Mean	14.39	7.378	8.87
				Lower 95% CI	70.23	30.61	75.82
				Upper 95% CI	131.2	61.75	113.2
				Mean ranks	32.65	15.39	33.28
Figure	Parameter	Statistical Test	P-value	Parameter	wt	syt7ko	syt7ko+cpxII	Tukey's multiple comparisons test	Mean Diff.	95.00% CI of diff.	Below threshold?	Summary	Adjusted P Value
Fig. 5 Suppl. 2 B	SRP	ANOVA	0.0008	Number of values	17	18	18	wt vs. syt7ko	36.63	14.63 to 58.63	Yes	***	0.0006
								wt vs. syt7ko+cpxII	14.93	-7.065 to 36.93	No	ns	0.2387
				Minimum	21.19	3.997	29.49	syt7ko vs. syt7ko+cpxII	-21.7	-43.38 to -0.01409	Yes	*	0.0498
				25% Percentile	49.5	23.11	38.96
				Median	62.84	36.94	54.41
				75% Percentile	97.45	51.13	80.79
				Maximum	158.8	67.24	102.4
				Mean	74.38	37.75	59.44
				Std. Deviation	36.77	17.76	23.34
				Std. Error of Mean	8.918	4.186	5.502
				Lower 95% CI	55.47	28.92	47.84
				Upper 95% CI	93.28	46.58	71.05
Figure	Parameter	Statistical Test	P-value	Parameter	wt	syt7ko	syt7ko+cpxII	Tukey's multiple comparisons test	Mean Diff.	95.00% CI of diff.	Below threshold?	Summary	Adjusted P Value
Fig. 5 Suppl. 2 B	SR	ANOVA	0.8376	Number of values	17	18	18	wt vs. syt7ko	2.199	-8.641 to 13.04	No	ns	0.8764
								wt vs. syt7ko+cpxII	2.44	-8.401 to 13.28	No	ns	0.8502
				Minimum	0.5775	0.376	0.7844	syt7ko vs. syt7ko+cpxII	0.2406	-10.44 to 10.92	No	ns	0.9984
				25% Percentile	10.26	11.37	15.97
				Median	24.79	17.73	19.82
				75% Percentile	32.28	29.67	25.31
				Maximum	46.06	58.55	52.08
				Mean	23.35	21.15	20.91
				Std. Deviation	13.04	14.38	12.29
				Std. Error of Mean	3.163	3.389	2.898
				Lower 95% CI	16.64	14	14.79
				Upper 95% CI	30.05	28.3	27.02

## Sheet: Fig. 5 Suppl_2 C
Figure	Parameter	Statistical Test	P-value	Parameter	wt	syt7ko	syt7ko+cpxII	Tukey's multiple comparisons test	Mean Diff.	95.00% CI of diff.	Below threshold?	Summary	Adjusted P Value
Fig. 5 Suppl. 2 C	tauRRP	ANOVA	0.0144	Number of values	17	18	18	wt vs. syt7ko	6.523	1.233 to 11.81	Yes	*	0.0122
								wt vs. syt7ko+cpxII	4.514	-0.7763 to 9.805	No	ns	0.1085
				Minimum	6.045	2.854	6.574	syt7ko vs. syt7ko+cpxII	-2.009	-7.224 to 3.206	No	ns	0.6237
				25% Percentile	11.03	7.227	8.997
				Median	16.45	10.03	11.91
				75% Percentile	20.5	15.28	14.65
				Maximum	43.7	17.44	24.28
				Mean	17.12	10.59	12.6
				Std. Deviation	9.213	4.456	4.86
				Std. Error of Mean	2.235	1.05	1.146
				Lower 95% CI	12.38	8.377	10.18
				Upper 95% CI	21.85	12.81	15.02
Figure	Parameter	Statistical Test	P-value	Parameter	wt	syt7ko	syt7ko+cpxII	Dunn's multiple comparisons test	Mean rank diff.	Significant?	Summary	Adjusted P Value
Fig. 5 Suppl. 2 C	tauSRP	Kruskal-Wallis test	0.003	Number of values	17	18	18	wt vs. syt7ko	5.941	No	ns	0.766
								wt vs. syt7ko+cpxII	17.44	Yes	**	0.0025
				Minimum	130.1	65.87	29.73	syt7ko vs. syt7ko+cpxII	11.5	No	ns	0.0765
				25% Percentile	176.2	127.3	66.71
				Median	245	205	126.8
				75% Percentile	323.4	279.8	182
				Maximum	883.5	1134	357.7
				Mean	324.4	272	139.1
				Std. Deviation	239.1	269	93.79
				Std. Error of Mean	57.98	63.39	22.11
				Lower 95% CI	201.5	138.2	92.45
				Upper 95% CI	447.3	405.7	185.7
				Mean ranks	34.94	29	17.5

## Sheet: Fig. 5 Suppl_2 E
Figure	Parameter	Statistical Test	P-value	Parameter	wt	syt7ko	syt7ko+cpxII	Tukey's multiple comparisons test	Mean Diff.	95.00% CI of diff.	Below threshold?	Summary	Adjusted P Value
Fig. 5 Suppl. 2 E	premature exocytosis	ANOVA	<0.0001	Number of values	17	18	18	wt vs. syt7ko	5.369	0.04241 to 10.70	Yes	*	0.0478
								wt vs. syt7ko+cpxII	11.35	6.028 to 16.68	Yes	****	<0.0001
				Minimum	-2.516	-10.06	-15.21	syt7ko vs. syt7ko+cpxII	5.986	0.7362 to 11.24	Yes	*	0.0219
				25% Percentile	3.128	-2.417	-7.138
				Median	8.118	0.0389	-3.116
				75% Percentile	11.12	9.413	1.227
				Maximum	18.53	14.64	6.518
				Mean	7.644	2.275	-3.711
				Std. Deviation	6.209	6.956	6.353
				Std. Error of Mean	1.506	1.64	1.498
				Lower 95% CI	4.452	-1.184	-6.87
				Upper 95% CI	10.84	5.735	-0.5512

## Sheet: Fig. 5 Suppl_2 F
Figure	Parameter	Statistical Test	P-value	Parameter	wt	syt7ko	syt7ko+cpxII	Dunn's multiple comparisons test	Mean rank diff.	Significant?	Summary	Adjusted P Value
Fig. 5 Suppl. 2 E	premature exocytosis	Kruskal-Wallis	0.0169	Number of values	17	18	18	wt vs. syt7ko	11.8	No	ns	0.0716
								wt vs. syt7ko+cpxII	-1.755	No	ns	>0.9999
				Minimum	422.4	252.4	368.1	syt7ko vs. syt7ko+cpxII	-13.56	Yes	*	0.0254
				25% Percentile	596.9	437	569.4
				Median	670.6	588.5	672.4
				75% Percentile	722.2	628.7	802.4
				Maximum	844.8	852.6	963.4
				Mean	656	552.2	682.3
				Std. Deviation	112.6	138	153
				Std. Error of Mean	27.3	32.54	36.07
				Lower 95% CI	598.1	483.5	606.2
				Upper 95% CI	713.9	620.8	758.4
