# Supplementary material for: Key determinants of the dual clamp/activator function of Complexin
Source: eLife. 2024 Nov 25;12:RP92438. doi: 10.7554/eLife.92438 (PMC11589869; doi:10.7554/eLife.92438)
Supplement: Figure 5—source data 1. [file elife-92438-fig5-data1.xlsx]

## Sheet: Fig. 5b
Figure	Parameter	Statistical Test	P-value	Parameter	wt	Syt1ko	cpxIIko	syt1_cpxII dko	Dunn's multiple comparisons test	Mean rank diff.	Significant?	Summary	Adjusted P Value
Fig. 5b	RRP	Kruskal-Wallis test	<0.0001	Number of values	50	46	35	26	wt vs. syt1ko	78.17	Yes	****	<0.0001
									wt vs. cpxIIko	61.71	Yes	****	<0.0001
				Minimum	17.28	0	0	0	wt vs. syt1_cpxII dko	68.6	Yes	****	<0.0001
				25% Percentile	67.16	4.474	0	7.723	syt1ko vs. cpxIIko	-16.47	No	ns	0.6341
				Median	82.13	14.4	24.37	17.91	syt1ko vs. syt1_cpxII dko	-9.575	No	ns	>0.9999
				75% Percentile	125.5	25.72	41.75	35.81	cpxIIko vs. syt1_cpxII dko	6.891	No	ns	>0.9999
				Maximum	292.4	79.37	88.67	52.16
				Mean	98.86	16.73	27.71	21.43
				Std. Deviation	53.73	15.73	24.82	16.63
				Std. Error of Mean	7.598	2.319	4.195	3.261
				Lower 95% CI	83.59	12.06	19.19	14.72
				Upper 95% CI	114.1	21.4	36.24	28.15
				Mean ranks	127	48.85	65.31	58.42
Figure	Parameter	Statistical Test	P-value	Parameter	wt	Syt1ko	cpxIIko	syt1_cpxII dko	Tukey's multiple comparisons test	Mean Diff.	95.00% CI of diff.	Below threshold?	Summary	Adjusted P Value
Fig. 5b	SRP	One-way ANOVA	0.0002	Number of values	50	46	35	26	wt vs. syt1ko	-6.369	-28.17 to 15.43	No	ns	0.8727
									wt vs. cpxIIko	29.92	6.407 to 53.44	Yes	**	0.0064
				Minimum	19.51	5.588	0	0	wt vs. syt1_cpxII dko	21.62	-4.183 to 47.42	No	ns	0.1345
				25% Percentile	43.68	39.14	12	37.41	syt1ko vs. cpxIIko	36.29	12.36 to 60.23	Yes	***	0.0007
				Median	69.69	74.61	32.64	51.77	syt1ko vs. syt1_cpxII dko	27.99	1.805 to 54.17	Yes	*	0.0311
				75% Percentile	94.92	118.8	63.6	67.18	cpxIIko vs. syt1_cpxII dko	-8.307	-35.93 to 19.32	No	ns	0.863
				Maximum	206.5	216.5	147.6	135.9
				Mean	73.95	80.32	44.03	52.33
				Std. Deviation	36.84	52.06	39.07	26.72
				Std. Error of Mean	5.21	7.676	6.604	5.24
				Lower 95% CI	63.48	64.86	30.61	41.54
				Upper 95% CI	84.42	95.78	57.45	63.13
Figure	Parameter	Statistical Test	P-value	Parameter	wt	Syt1ko	cpxIIko	syt1_cpxII dko	Dunn's multiple comparisons test	Mean rank diff.	Significant?	Summary	Adjusted P Value
Fig. 5b	SR	Kruskal-Wallis test	0.0151	Number of values	50	46	35	26	wt vs. syt1ko	28.66	Yes	*	0.0122
									wt vs. cpxIIko	5.317	No	ns	>0.9999
				Minimum	6.819	0.006509	1.093e-18	1.224e-20	wt vs. syt1_cpxII dko	13.74	No	ns	>0.9999
				25% Percentile	15.78	9.534	10.8	10.66	syt1ko vs. cpxIIko	-23.35	No	ns	0.1323
				Median	20.1	15.47	20.95	17.86	syt1ko vs. syt1_cpxII dko	-14.92	No	ns	>0.9999
				75% Percentile	27.48	20.26	29.99	30.43	cpxIIko vs. syt1_cpxII dko	8.427	No	ns	>0.9999
				Maximum	54.16	53.68	56.61	42.73
				Mean	23.03	16.39	23.28	20.34
				Std. Deviation	10.93	10.14	15.4	11.77
				Std. Error of Mean	1.546	1.495	2.603	2.309
				Lower 95% CI	19.92	13.38	17.99	15.58
				Upper 95% CI	26.13	19.4	28.57	25.09
				Mean ranks	90.86	62.2	85.54	77.12

## Sheet: Fig. 5D
Figure	Parameter	Statistical Test	P-value	Parameter	wt	Syt1ko	cpxIIko	syt1_cpxII dko	Dunn's multiple comparisons test	Mean rank diff.	Significant?	Summary	Adjusted P Value
Fig. 5D	Tau RRP	Kruskal-Wallis test	<0.0001	Number of values	50	37	25	20	wt vs. syt1ko	-11	No	ns	>0.9999
									wt vs. cpxIIko	-71.12	Yes	****	<0.0001
				Minimum	2.988	3.478	18.86	11.52	wt vs. syt1_cpxII dko	-60.64	Yes	****	<0.0001
				25% Percentile	8.236	8.676	39.49	30.63	syt1ko vs. cpxIIko	-60.12	Yes	****	<0.0001
				Median	11.72	15.17	55.22	43.34	syt1ko vs. syt1_cpxII dko	-49.64	Yes	****	<0.0001
				75% Percentile	14.08	19.79	75.35	50.15	cpxIIko vs. syt1_cpxII dko	10.48	No	ns	>0.9999
				Maximum	31.28	31.92	113.3	95
				Mean	12.26	14.8	57.64	43.17
				Std. Deviation	5.408	7.133	25.45	18.16
				Std. Error of Mean	0.7649	1.173	5.091	4.06
				Lower 95% CI	10.72	12.42	47.13	34.67
				Upper 95% CI	13.8	17.18	68.14	51.66
				Mean ranks	40.76	51.76	111.9	101.4
Figure	Parameter	Statistical Test	P-value	Parameter	wt	Syt1ko	cpxIIko	syt1_cpxII dko	Dunn's multiple comparisons test	Mean rank diff.	Significant?	Summary	Adjusted P Value
Fig. 5D	Tau SRP	Kruskal-Wallis test	<0.0001	Number of values	50	46	30	25	wt vs. syt1ko	-53.7	Yes	****	<0.0001
									wt vs. cpxIIko	-62.7	Yes	****	<0.0001
				Minimum	55.27	31.76	159.9	182.4	wt vs. syt1_cpxII dko	-70.58	Yes	****	<0.0001
				25% Percentile	107	251.5	275.6	357.7	syt1ko vs. cpxIIko	-9.004	No	ns	>0.9999
				Median	144.5	372.3	377.8	512.3	syt1ko vs. syt1_cpxII dko	-16.88	No	ns	0.7214
				75% Percentile	199.4	604.5	653.5	633	cpxIIko vs. syt1_cpxII dko	-7.88	No	ns	>0.9999
				Maximum	468.9	831.6	2024	872.7
				Mean	167.7	410.1	520.9	498.6
				Std. Deviation	94.02	208.2	383.3	184.5
				Std. Error of Mean	13.3	30.7	69.98	36.89
				Lower 95% CI	141	348.3	377.8	422.5
				Upper 95% CI	194.5	472	664	574.8
				Mean ranks	35.5	89.2	98.2	106.1
Figure	Parameter	Statistical Test	P-value	Parameter	wt	Syt1ko	cpxIIko	syt1_cpxII dko	Dunn's multiple comparisons test	Mean rank diff.	Significant?	Summary	Adjusted P Value
Fig. 5D	delay	Kruskal-Wallis test	<0.0001	Number of values	50	43	35	26	wt vs. syt1ko	-50.38	Yes	****	<0.0001
									wt vs. cpxIIko	-75.38	Yes	****	<0.0001
				Minimum	0.4494	-0.5563	3.32	4.016	wt vs. syt1_cpxII dko	-76.64	Yes	****	<0.0001
				25% Percentile	1.67	3.551	6.42	6.993	syt1ko vs. cpxIIko	-25	No	ns	0.0829
				Median	2.544	5.948	8.286	8.37	syt1ko vs. syt1_cpxII dko	-26.26	No	ns	0.1068
				75% Percentile	3.42	9.39	9.983	9.897	cpxIIko vs. syt1_cpxII dko	-1.257	No	ns	>0.9999
				Maximum	5.701	20.97	16.43	16.48
				Mean	2.677	6.914	8.767	8.978
				Std. Deviation	1.305	4.495	3.227	3.354
				Std. Error of Mean	0.1845	0.6854	0.5455	0.6578
				Lower 95% CI	2.307	5.531	7.659	7.623
				Upper 95% CI	3.048	8.297	9.876	10.33
				Mean ranks	33.36	83.74	108.7	110

## Sheet: Fig. 5F
Figure	Parameter	Statistical Test	P-value	Parameter	wt	Syt1ko	cpxIIko	syt1_cpxII dko	Tukey's multiple comparisons test	Mean Diff.	95.00% CI of diff.	Below threshold?	Summary	Adjusted P Value
Fig. 5F	premature secretion	One-way ANOVA	<0.0001	Number of values	50	46	35	26	wt vs. syt1ko	-1.263	-6.100 to 3.574	No	ns	0.9053
									wt vs. cpxIIko	-15.31	-20.58 to -10.04	Yes	****	<0.0001
				Minimum	0.6545	1.758	11.91	6.657	wt vs. syt1_cpxII dko	-13.3	-19.08 to -7.525	Yes	****	<0.0001
				25% Percentile	8.124	8.143	20.48	16.87	syt1ko vs. cpxIIko	-14.05	-19.34 to -8.755	Yes	****	<0.0001
				Median	12.79	14.58	30.66	26.04	syt1ko vs. syt1_cpxII dko	-12.04	-17.84 to -6.241	Yes	****	<0.0001
				75% Percentile	18.47	21.48	34.76	33.59	cpxIIko vs. syt1_cpxII dko	2.008	-4.159 to 8.174	No	ns	0.8326
				Maximum	38.88	36.77	46.76	58.76
				Mean	13.84	15.1	29.15	27.15
				Std. Deviation	7.863	7.765	8.659	13.56
				Std. Error of Mean	1.123	1.121	1.464	2.66
				Lower 95% CI	11.58	12.85	26.18	21.67
				Upper 95% CI	16.1	17.36	32.13	32.62

## Sheet: Fig. 5H
Figure	Parameter	Statistical Test	P-value	Parameter	wt	syt7ko	cpxIIko	cpxII_syt7dko	Dunn's multiple comparisons test	Mean rank diff.	Significant?	Summary	Adjusted P Value
Fig. 5H	RRP	Kruskal-Wallis test	<0.0001	Number of values	17	20	20	24	wt vs. syt7ko	19.34	No	ns	0.0655
									wt vs. cpxIIko	28.49	Yes	**	0.0011
				Minimum	43.77	20.19	0	0	wt vs. cpxII_syt7dko	54.44	Yes	****	<0.0001
				25% Percentile	64.56	27.08	4.396	0	syt7ko vs. cpxIIko	9.15	No	ns	>0.9999
				Median	102.7	43.16	30.29	0	syt7ko vs. cpxII_syt7dko	35.1	Yes	****	<0.0001
				75% Percentile	163.8	66.68	49.73	0	cpxIIko vs. cpxII_syt7dko	25.95	Yes	**	0.0012
				Maximum	312.2	82.58	118.6	0
				Mean	120.9	46.99	34.23	0
				Std. Deviation	71.61	20.69	32.77	0
				Std. Error of Mean	17.37	4.626	7.328	0
				Lower 95% CI	84.11	37.31	18.89	0
				Upper 95% CI	157.7	56.67	49.56	0
				Mean ranks	68.94	49.6	40.45	14.5
Figure	Parameter	Statistical Test	P-value	Parameter	wt	Syt7ko	cpxIIko	cpxII_syt7dko	Dunn's multiple comparisons test	Mean rank diff.	Significant?	Summary	Adjusted P Value
Fig. 5H	SRP	Kruskal-Wallis test	<0.0001	Number of values	17	20	20	24	wt vs. syt7ko	12.79	No	ns	0.5824
									wt vs. cpxIIko	15.89	No	ns	0.2357
				Minimum	26.19	26.48	0	0	wt vs. cpxII_syt7dko	47.96	Yes	****	<0.0001
				25% Percentile	75.99	46.75	32.41	0	syt7ko vs. cpxIIko	3.1	No	ns	>0.9999
				Median	109.8	65.3	63.76	0	syt7ko vs. cpxII_syt7dko	35.17	Yes	****	<0.0001
				75% Percentile	116.8	84.17	81.62	7.371	cpxIIko vs. cpxII_syt7dko	32.07	Yes	****	<0.0001
				Maximum	187.2	166.5	245.3	56.99
				Mean	101.6	71.38	72.36	7.015
				Std. Deviation	40.84	32.36	55.65	15.51
				Std. Error of Mean	9.905	7.236	12.44	3.166
				Lower 95% CI	80.57	56.23	46.31	0.4656
				Upper 95% CI	122.6	86.52	98.4	13.56
				Mean ranks	62.29	49.5	46.4	14.33
Figure	Parameter	Statistical Test	P-value	Parameter	wt	Syt7ko	cpxIIko	cpxII_syt7dko	Dunn's multiple comparisons test	Mean rank diff.	Significant?	Summary	Adjusted P Value
Fig. 5H	SR	Kruskal-Wallis test	0.3897	Number of values	17	20	20	24	wt vs. syt7ko	6.132	No	ns	>0.9999
									wt vs. cpxIIko	-6.768	No	ns	>0.9999
				Minimum	2.783	4.827	6.839	5.162	wt vs. cpxII_syt7dko	0.1324	No	ns	>0.9999
				25% Percentile	10.14	8.024	10.89	9.687	syt7ko vs. cpxIIko	-12.9	No	ns	0.4976
				Median	12.73	11.5	16.19	14.97	syt7ko vs. cpxII_syt7dko	-6	No	ns	>0.9999
				75% Percentile	24.09	21.4	31.41	20.57	cpxIIko vs. cpxII_syt7dko	6.9	No	ns	>0.9999
				Maximum	31.07	45.38	50.94	40.78
				Mean	16.62	15.89	21.11	16.68
				Std. Deviation	8.546	11.19	13.33	8.711
				Std. Error of Mean	2.073	2.501	2.981	1.778
				Lower 95% CI	12.22	10.65	14.87	13.01
				Upper 95% CI	21.01	21.12	27.35	20.36
				Mean ranks	40.88	34.75	47.65	40.75

## Sheet: Fig. 5J
Figure	Parameter	Statistical Test	P-value	Parameter	wt	syt7ko	cpxIIko	cpxII_syt7dko	Dunn's multiple comparisons test	Mean rank diff.	Significant?	Summary	Adjusted P Value
Fig. 5 J	Tau RRP	Kruskal-Wallis test	<0.0001	Number of values	17	20	16	24	wt vs. syt7ko	11.31	No	ns	0.0791
									wt vs. cpxIIko	-14.92	Yes	*	0.0166
				Minimum	6.961	5.813	25.28	not determinable	syt7ko vs. cpxIIko	-26.24	Yes	****	<0.0001
				25% Percentile	13.33	9.203	34.96	not determinable	cpxIIko vs. cpxII_syt7dko				not determinable
				Median	28.53	16.55	40.52	not determinable
				75% Percentile	41.56	21.88	72.99	not determinable
				Maximum	54.52	26.19	207.8	not determinable
				Mean	28.04	16.02	66.56	not determinable
				Std. Deviation	15.32	6.541	52.22	not determinable
				Std. Error of Mean	3.715	1.463	13.06	not determinable
				Lower 95% CI	20.16	12.96	38.74	not determinable
				Upper 95% CI	35.91	19.08	94.39	not determinable
				Mean ranks	26.76	15.45	41.69	not determinable
Figure	Parameter	Statistical Test	P-value	Parameter	wt	syt7ko	cpxIIko	cpxII_syt7dko	Dunn's multiple comparisons test	Mean rank diff.	Significant?	Summary	Adjusted P Value
Fig. 5 J	Tau SRP	Kruskal-Wallis test	0.0725	Number of values	17	20	19	24	wt vs. syt7ko	-3.632	No	ns	>0.9999
									wt vs. cpxIIko	-12.04	No	ns	0.081
				Minimum	153.8	35.15	122.9	not determinable	syt7ko vs. cpxIIko	-8.408	No	ns	0.3227
				25% Percentile	239.8	245.1	285	not determinable	cpxIIko vs. cpxII_syt7dko				not determinable
				Median	264.3	317.5	476.5	not determinable
				75% Percentile	368.8	409.2	685.9	not determinable
				Maximum	875.9	1125	1439	not determinable
				Mean	327.8	360.6	520.3	not determinable
				Std. Deviation	166.7	240.2	352.3	not determinable
				Std. Error of Mean	40.43	53.72	80.82	not determinable
				Lower 95% CI	242.1	248.2	350.5	not determinable
				Upper 95% CI	413.5	473.1	690.1	not determinable
				Mean ranks	23.12	26.75	35.16	not determinable
Figure	Parameter	Statistical Test	P-value	Parameter	wt	syt7ko	cpxIIko	cpxII_syt7dko	Dunn's multiple comparisons test	Mean rank diff.	Significant?	Summary	Adjusted P Value
Fig. 5 J	delay	Kruskal-Wallis test	<0.0001	Number of values	17	20	20	6	wt vs. syt7ko	8.544	No	ns	0.946
									wt vs. cpxIIko	-20.01	Yes	**	0.0056
				Minimum	1.994	0.7792	3.337	2.774	wt vs. cpxII_syt7dko	-11.21	No	ns	>0.9999
				25% Percentile	2.503	1.462	6.181	2.848	syt7ko vs. cpxIIko	-28.55	Yes	****	<0.0001
				Median	3.88	2.54	7.403	5.689	syt7ko vs. cpxII_syt7dko	-19.75	No	ns	0.1238
				75% Percentile	5.039	3.961	9.51	9.035	cpxIIko vs. cpxII_syt7dko	8.8	No	ns	>0.9999
				Maximum	10.46	10.29	58.49	9.804
				Mean	4.18	3.174	9.894	5.935
				Std. Deviation	2.082	2.532	11.65	2.952
				Std. Error of Mean	0.5049	0.5662	2.604	1.205
				Lower 95% CI	3.11	1.989	4.442	2.837
				Upper 95% CI	5.251	4.359	15.34	9.033
				Mean ranks	27.29	18.75	47.3	38.5

## Sheet: Fig. 5 L
Figure	Parameter	Statistical Test	P-value	Parameter	wt	syt7ko	cpxIIko	cpxII_syt7dko	Dunn's multiple comparisons test	Mean rank diff.	Significant?	Summary	Adjusted P Value
Fig. 5L	premature secretion	Kruskal-Wallis test	<0.0001	Number of values	17	20	20	24	wt vs. syt7ko	21.01	Yes	*	0.0407
									wt vs. cpxIIko	-25.54	Yes	**	0.006
				Minimum	3.349	-5.078	12.39	-15.39	wt vs. cpxII_syt7dko	-2.775	No	ns	>0.9999
				25% Percentile	5.998	-1.312	17.94	4.382	syt7ko vs. cpxIIdko	-46.55	Yes	****	<0.0001
				Median	7.052	1.439	25.59	13.57	syt7ko vs. cpxII_syt7dko	-23.78	Yes	**	0.005
				75% Percentile	11.69	4.801	40.69	19.8	cpxIIko vs. cpxII_syt7dko	22.77	Yes	**	0.0084
				Maximum	47.07	17.05	56.82	41.56
				Mean	12.68	2.344	29.1	12.56
				Std. Deviation	13.12	5.182	13.51	12.44
				Std. Error of Mean	3.183	1.159	3.02	2.539
				Lower 95% CI	5.933	-0.08085	22.78	7.305
				Upper 95% CI	19.43	4.77	35.42	17.81
				Mean ranks	39.06	18.05	64.6	41.83
