# Supplementary material for: Key determinants of the dual clamp/activator function of Complexin
Source: eLife. 2024 Nov 25;12:RP92438. doi: 10.7554/eLife.92438 (PMC11589869; doi:10.7554/eLife.92438)
Supplement: Figure 6—source data 1. [file elife-92438-fig6-data1.xlsx]

## Sheet: Fig. 6B
Figure	Parameter	Statistical Test	P-value	Parameter	RRP wt	RRP Syt1Ko	Rate RRP Syt1ko+CpxII	RRP Syt1ko+CpxII DN	Dunn's multiple comparisons test	Mean rank diff.	Significant?	Summary	Adjusted P Value
Fig. 6 B	RRP	Kruskal-Wallis test	0.0001	Number of values	13	19	16	20	RRP wt vs. RRP Syt1Ko	25.59	Yes	**	0.0019
									RRP wt vs. RRP Syt1ko+CpxII	26.85	Yes	**	0.0016
				Minimum	29.44	1	1	2.508e-22	RRP wt vs. RRP Syt1ko+CpxII DN	29.14	Yes	***	0.0002
				25% Percentile	56.42	25.01	15.06	8.841	RRP Syt1Ko vs. RRP Syt1ko+CpxII	1.26	No	ns	>0.9999
				Median	102.9	40	33.04	29.01	RRP Syt1Ko vs. RRP Syt1ko+CpxII DN	3.547	No	ns	>0.9999
				75% Percentile	168.8	48.69	53.75	56.98	Rate RRP Syt1ko+CpxII vs. RRP Syt1ko+CpxII DN	2.288	No	ns	>0.9999
				Maximum	293.3	93.56	70	199.6
				Mean	121	35.76	32.77	38.91
				Std. Deviation	76.62	22.46	23	46.89
				Std. Error of Mean	21.25	5.152	5.75	10.48
				Lower 95% CI	74.71	24.94	20.51	16.97
				Upper 95% CI	167.3	46.58	45.02	60.85
				Mean ranks	56.54	30.95	29.69	27.4
Figure	Parameter	Statistical Test	P-value		SRP wt	SRP Syt1Ko	SRP Syt1ko+CpxII	SRP Syt1ko+CpxII DN	Dunn's multiple comparisons test	Mean rank diff.	Significant?	Summary	Adjusted P Value	Adjusted P Value
Fig. 6 B	SRP	Kruskal-Wallis test	0.2503	Number of values	13	19	16	20	SRP wt vs. SRP Syt1Ko	6.336	No	ns	>0.9999	0.0405
									SRP wt vs. SRP Syt1ko+CpxII	14.7	No	ns	0.2781	0.0013
				Minimum	31.65	53.31	80	40.84	SRP wt vs. SRP Syt1ko+CpxII DN	8.506	No	ns	>0.9999	0.0112
				25% Percentile	132.3	86.33	100	99.8	SRP Syt1Ko vs. SRP Syt1ko+CpxII	8.363	No	ns	>0.9999	0.6027
				Median	169.2	148.2	118.6	129.6	SRP Syt1Ko vs. SRP Syt1ko+CpxII DN	2.17	No	ns	>0.9999	0.9713
				75% Percentile	193.7	186.8	130	181.8	SRP Syt1ko+CpxII vs. SRP Syt1ko+CpxII DN	-6.194	No	ns	>0.9999	0.84
				Maximum	305.9	300	200	535.6
				Mean	163.3	148.4	120	161.7
				Std. Deviation	74.31	64.98	27.57	115.1
				Std. Error of Mean	20.61	14.91	6.892	25.74
				Lower 95% CI	118.4	117.1	105.3	107.8
				Upper 95% CI	208.2	179.7	134.7	215.6
				Mean ranks	42.23	35.89	27.53	33.73
Figure	Parameter	Statistical Test	P-value	Parameteres	SR wt	SR Syt1Ko	SR Syt1ko+CpxII	SR Syt1ko+CpxII DN	Dunn's multiple comparisons test	Mean rank diff.	Significant?	Summary	Adjusted P Value
Fig. 6 B	SR	Kruskal-Wallis test	0.1937	Number of values	13	19	16	20	SR wt vs. SR Syt1Ko	9.324	No	ns	>0.9999
									SR wt vs. SR Syt1ko+CpxII	8.88	No	ns	>0.9999
				Minimum	2.557	-0.5596	-0.00077	-10.61	SR wt vs. SR Syt1ko+CpxII DN	15.29	No	ns	0.1797
				25% Percentile	6.235	7.268	8.546	3.388	SR Syt1Ko vs. SR Syt1ko+CpxII	-0.4441	No	ns	>0.9999
				Median	19.34	12.65	13.53	7.824	SR Syt1Ko vs. SR Syt1ko+CpxII DN	5.968	No	ns	>0.9999
				75% Percentile	42.84	20.83	15.71	23.38	SR Syt1ko+CpxII vs. SR Syt1ko+CpxII DN	6.413	No	ns	>0.9999
				Maximum	66.69	32.13	53.67	50.42
				Mean	26.33	13.8	15.48	12.74
				Std. Deviation	22.02	8.857	14.07	15.42
				Std. Error of Mean	6.107	2.032	3.517	3.447
				Lower 95% CI	13.03	9.532	7.986	5.526
				Upper 95% CI	39.64	18.07	22.98	19.96
				Mean ranks	43.69	34.37	34.81	28.4

## Sheet: Fig.6D
Figure	Parameter	Statistical Test	P-value	Parameter	tau RRP wt	tau RRP Syt1Ko	tau RRP Syt1ko+CpxII	tau RRP Syt1ko+CpxII DN	Dunn's multiple comparisons test	Mean rank diff.	Significant?	Summary	Adjusted P Value
Fig. 6 D	Tau RRP	Kruskal-Wallis test	<0.0001	Number of values	13	15	13	18	tau RRP wt vs. tau RRP Syt1Ko	-29.92	Yes	****	<0.0001
									tau RRP wt vs. tau RRP Syt1ko+CpxII	-27.15	Yes	***	0.0003
				Minimum	8.409	13.28	50	14.37	tau RRP wt vs. tau RRP Syt1ko+CpxII DN	-24.03	Yes	***	0.0007
				25% Percentile	14.9	79.26	54.28	58.82	tau RRP Syt1Ko vs. tau RRP Syt1ko+CpxII	2.769	No	ns	>0.9999
				Median	17.26	167.3	66.67	75.6	tau RRP Syt1Ko vs. tau RRP Syt1ko+CpxII DN	5.889	No	ns	>0.9999
				75% Percentile	24.41	200	205.9	136.9	tau RRP Syt1ko+CpxII vs. tau RRP Syt1ko+CpxII DN	3.12	No	ns	>0.9999
				Maximum	38.6	263.8	240.9	574.4
				Mean	19.65	133.1	121.8	116.5
				Std. Deviation	8.15	73.79	79.26	123.9
				Std. Error of Mean	2.26	19.05	21.98	29.2
				Lower 95% CI	14.72	92.25	73.89	54.92
				Upper 95% CI	24.57	174	169.7	178.1
				Mean ranks	9.077	39	36.23	33.11
Figure	Parameter	Statistical Test	P-value	Parameter	tau SRP wt	tau SRP Syt1Ko	tau SRP Syt1ko+CpxII	tau SRP Syt1ko+CpxII DN	Dunn's multiple comparisons test	Mean rank diff.	Significant?	Summary	Adjusted P Value
Fig. 6 D	tau SRP	Kruskal-Wallis test	<0.0001	Number of values	13	19	16	20
									tau SRP wt vs. tau SRP Syt1Ko	-32.59	Yes	****	<0.0001
				Minimum	169.8	363	359.4	224.4	tau SRP wt vs. tau SRP Syt1ko+CpxII	-23.48	Yes	**	0.0088
				25% Percentile	257	447.5	424.7	412.5	tau SRP wt vs. tau SRP Syt1ko+CpxII DN	-25.19	Yes	**	0.0021
				Median	315.9	780.2	509.5	503.7	tau SRP Syt1Ko vs. tau SRP Syt1ko+CpxII	9.115	No	ns	>0.9999
				75% Percentile	377.5	884.4	604.4	726.4	tau SRP Syt1Ko vs. tau SRP Syt1ko+CpxII DN	7.403	No	ns	>0.9999
				Maximum	540.3	1118	966.2	1398	tau SRP Syt1ko+CpxII vs. tau SRP Syt1ko+CpxII DN	-1.713	No	ns	>0.9999
				Mean	321.4	698.1	554.2	616
				Std. Deviation	99.4	229.6	180.2	315.7
				Std. Error of Mean	27.57	52.68	45.05	70.59
				Lower 95% CI	261.4	587.4	458.2	468.3
				Upper 95% CI	381.5	808.7	650.3	763.8
				Mean ranks	12.46	45.05	35.94	37.65
Figure	Parameter	Statistical Test	P-value	Parameter	Delay wt	Delay Syt1Ko	Delay Syt1ko+CpxII	Delay Syt1ko+CpxII DN	Dunn's multiple comparisons test	Mean rank diff.	Significant?	Summary	Adjusted P Value
Fig. 6 D	delay	Kruskal-Wallis test	0.0038	Number of values	12	15	12	19	Delay wt vs. Delay Syt1Ko	-22.32	Yes	**	0.0039
									Delay wt vs. Delay Syt1ko+CpxII	-19.58	Yes	*	0.027
				Minimum	1.259	-0.9746	3.184	-4.775	Delay wt vs. Delay Syt1ko+CpxII DN	-17.07	Yes	*	0.0366
				25% Percentile	1.754	6.019	4.36	3.246	Delay Syt1Ko vs. Delay Syt1ko+CpxII	2.733	No	ns	>0.9999
				Median	3.166	12.43	7.979	9.337	Delay Syt1Ko vs. Delay Syt1ko+CpxII DN	5.242	No	ns	>0.9999
				75% Percentile	4.028	29.71	24.8	20.24	Delay Syt1ko+CpxII vs. Delay Syt1ko+CpxII DN	2.509	No	ns	>0.9999
				Maximum	6.043	66.97	43.3	69
				Mean	3.138	18.71	14.38	16.66
				Std. Deviation	1.582	18.59	13.08	20.97
				Std. Error of Mean	0.4567	4.801	3.777	4.81
				Lower 95% CI	2.133	8.413	6.067	6.55
				Upper 95% CI	4.143	29.01	22.69	26.76
				Mean ranks	14.08	36.4	33.67	31.16

## Sheet: Fig. 6F
Figure	Parameter	Statistical Test	P-value	Parameter	wt	Syt1Ko	Syt1ko+CpxII	Syt1ko+CpxII DN	Dunn's multiple comparisons test	Mean rank diff.	Significant?	Summary	Adjusted P Value	Adjusted P Value
Fig. 6 F	premature secretion	Kruskal-Wallis test	<0.0001	Number of values	13	19	16	19	Dunn's multiple comparisons test	Mean rank diff.	Significant?	Summary	Adjusted P Value
									wt vs. Syt1Ko	-3.453	No	ns	>0.9999	A-B
				Minimum	2.161	5.034	-5.433	-6.907	wt vs. Syt1ko+CpxII	19.83	Yes	*	0.034	A-C
				25% Percentile	3.705	5.742	-3.216	-0.0596	wt vs. Syt1ko+CpxII DN	18.77	Yes	*	0.0396	A-D
				Median	6.37	8.076	-0.8624	2.572	Syt1Ko vs. Syt1ko+CpxII	23.28	Yes	**	0.0025	B-C
				75% Percentile	13.53	11.38	7.86	5.917	Syt1Ko vs. Syt1ko+CpxII DN	22.22	Yes	**	0.0026	B-D
				Maximum	33.89	26.09	15.98	15.38	Syt1ko+CpxII vs. Syt1ko+CpxII DN	-1.063	No	ns	>0.9999	C-D
				Mean	9.939	9.471	2.027	2.621
				Std. Deviation	8.6	5.061	6.884	4.989
				Std. Error of Mean	2.385	1.193	1.721	1.145
				Lower 95% CI	4.742	6.954	-1.642	0.2163
				Upper 95% CI	15.14	11.99	5.695	5.026
				Mean ranks	42.77	46.22	22.94	24

## Sheet:  Fig. 6 H
Figure	Parameter	Statistical Test	P-value	Parameter	wt	Syt1Ko	Syt7ko+CpxII DN	Dunn's multiple comparisons test	Mean rank diff.	Significant?	Summary	Adjusted P Value	Adjusted P Value
Fig. 6 H	RRP	Kruskal-Wallis test	0.0001	Number of values	13	17	29	wt vs. Syt7 ko	28.25	Yes	****	<0.0001
								wt vs. Syt7 ko+CpxII DN	22.72	Yes	***	0.0002
				Minimum	69.58	35	22.9	Syt7 ko vs. Syt7 ko+CpxII DN	-5.527	No	ns	0.8761
				25% Percentile	125.2	56.43	46.85
				Median	130	65	69
				75% Percentile	215	69.77	106.7
				Maximum	252	131.4	156
				Mean	160.7	65.77	79.02
				Std. Deviation	56.24	22.92	37.39
				Std. Error of Mean	15.6	5.559	6.944
				Lower 95% CI	126.7	53.98	64.8
				Upper 95% CI	194.6	77.55	93.24
				Mean ranks	49.31	21.06	26.59
Figure	Parameter	Statistical Test	P-value	Parameter	wt	Syt1Ko	Syt7ko+CpxII DN	Dunn's multiple comparisons test	Mean rank diff.	Significant?	Summary	Adjusted P Value	Adjusted P Value
Fig. 6 H	SRP	Kruskal-Wallis test	0.0098	Number of values	13	17	29	wt vs. Syt7 ko	18.74	Yes	**	0.0092
								wt vs. Syt7 ko+CpxII DN	13.74	Yes	*	0.0496
				Minimum	42.1	28.54	11.43	Syt7 ko vs. Syt7 ko+CpxII DN	-5.002	No	ns	>0.9999
				25% Percentile	77.77	40.37	37.62
				Median	96.78	59.17	70.35
				75% Percentile	162	71.59	95.84
				Maximum	208.6	176.8	277.9
				Mean	113.2	63.08	75.92
				Std. Deviation	55.74	34.77	51.59
				Std. Error of Mean	15.46	8.433	9.58
				Lower 95% CI	79.52	45.2	56.3
				Upper 95% CI	146.9	80.96	95.54
				Mean ranks	42.15	23.41	28.41
Figure	Parameter	Statistical Test	P-value	Parameter	wt	Syt1Ko	Syt7ko+CpxII DN	Tukey's multiple comparisons test	Mean Diff.	95.00% CI of diff.	Below threshold?	Summary	Adjusted P Value
Fig. 6 H	SR	ANOVA	0.259	Number of values	13	17	29	wt vs. Syt7 ko	4.396	-5.292 to 14.08	No	ns	0.5227
								wt vs. Syt7 ko+CpxII DN	6.06	-2.717 to 14.84	No	ns	0.2287
				Minimum	1.449	6.972	-3.465	Syt7 ko vs. Syt7 ko+CpxII DN	1.664	-6.368 to 9.696	No	ns	0.8722
				25% Percentile	9.656	10.67	8.809
				Median	21.31	20.08	17.94
				75% Percentile	35.43	25.09	22.22
				Maximum	50.49	29.92	42.4
				Mean	23.14	18.74	17.08
				Std. Deviation	14.44	7.284	10.9
				Std. Error of Mean	4.005	1.767	2.025
				Lower 95% CI	14.41	15	12.93
				Upper 95% CI	31.87	22.49	21.23

## Sheet: Fig. 6 J
Figure	Parameter	Statistical Test	P-value	Parameter	wt	Syt1Ko	Syt7ko+CpxII DN	Dunn's multiple comparisons test	Mean rank diff.	Significant?	Summary	Adjusted P Value
Fig. 6 J	tau RRP	Kruskal-Wallis test	<0.0001	Number of values	13	17	29	wt vs. Syt7 ko	16.43	Yes	*	0.0283
								wt vs. Syt7 ko+CpxII DN	-15.11	Yes	*	0.0252
				Minimum	3.464	4.753	10.73	Syt7 ko vs. Syt7 ko+CpxII DN	-31.53	Yes	****	<0.0001
				25% Percentile	12.55	5.691	21.67
				Median	18.26	7.223	33.98
				75% Percentile	25.12	9.471	41.75
				Maximum	33.32	15.5	134.9
				Mean	18.59	7.937	37.8
				Std. Deviation	8.513	3.021	26.2
				Std. Error of Mean	2.361	0.7327	4.866
				Lower 95% CI	13.45	6.383	27.83
				Upper 95% CI	23.73	9.49	47.77
				Mean ranks	27.31	10.88	42.41
Figure	Parameter	Statistical Test	P-value	Parameter	wt	Syt1Ko	Syt7ko+CpxII DN	Dunn's multiple comparisons test	Mean rank diff.	Significant?	Summary	Adjusted P Value
Fig. 6 J	tau SRP	Kruskal-Wallis test	<0.0001	Number of values	13	17	27	wt vs. Syt7 ko	12.26	No	ns	0.1351
								wt vs. Syt7 ko+CpxII DN	-14.38	Yes	*	0.0309
				Minimum	83.76	55.77	149	Syt7 ko vs. Syt7 ko+CpxII DN	-26.63	Yes	****	<0.0001
				25% Percentile	128.2	67.07	250.4
				Median	161.5	118.2	296.5
				75% Percentile	285.8	169.1	545.7
				Maximum	783.7	284.4	1823
				Mean	253.6	125.3	460.6
				Std. Deviation	215.2	62.6	416.8
				Std. Error of Mean	59.68	15.18	80.21
				Lower 95% CI	123.6	93.07	295.7
				Upper 95% CI	383.6	157.4	625.4
				Mean ranks	25.85	13.59	40.22
Figure	Parameter	Statistical Test	P-value	Parameter	wt	Syt1Ko	Syt7ko+CpxII DN	Dunn's multiple comparisons test	Mean rank diff.	Significant?	Summary	Adjusted P Value
Fig. 6 J	delay	Kruskal-Wallis test	<0.0001	Number of values	13	17	29	wt vs. Syt7 ko	-0.0905	No	ns	>0.9999
								wt vs. Syt7 ko+CpxII DN	-21.07	Yes	***	0.0007
				Minimum	2.912	4.531	4.7	Syt7 ko vs. Syt7 ko+CpxII DN	-20.98	Yes	***	0.0002
				25% Percentile	4.503	4.953	6.738
				Median	5.185	5.345	7.87
				75% Percentile	6.445	6.308	10.81
				Maximum	11.14	7.053	44.44
				Mean	5.949	5.685	10.55
				Std. Deviation	2.413	0.8484	8.271
				Std. Error of Mean	0.6692	0.2058	1.536
				Lower 95% CI	4.491	5.249	7.407
				Upper 95% CI	7.408	6.121	13.7
				Mean ranks	19.62	19.71	40.69

## Sheet: Fig. 6 L
Figure	Parameter	Statistical Test	P-value	Parameter	wt	Syt1Ko	Syt7ko+CpxII DN	Dunn's multiple comparisons test	Mean rank diff.	Significant?	Summary	Adjusted P Value
Fig. 6 L	premature secretion	Kruskal-Wallis test	<0.0001	Number of values	12	14	28	wt vs. Syt7 ko	20.04	Yes	**	0.0036
								wt vs. Syt7 ko+CpxII DN	25.26	Yes	****	<0.0001
				Minimum	3.828	-10.88	-34.53	Syt7 ko vs. Syt7 ko+CpxII DN	5.214	No	ns	0.9337
				25% Percentile	7.805	-6.421	-7.928
				Median	8.804	-1.403	-0.9646
				75% Percentile	12.51	7.604	2.714
				Maximum	24.55	13.93	6.974
				Mean	10.64	0.1679	-4.608
				Std. Deviation	5.319	7.828	11.15
				Std. Error of Mean	1.535	2.092	2.108
				Lower 95% CI	7.256	-4.352	-8.933
				Upper 95% CI	14.02	4.687	-0.2836
				Mean ranks	45.79	25.75	20.54
