# Supplementary material for: Key determinants of the dual clamp/activator function of Complexin
Source: eLife. 2024 Nov 25;12:RP92438. doi: 10.7554/eLife.92438 (PMC11589869; doi:10.7554/eLife.92438)
Supplement: Figure 7—source data 1. [file elife-92438-fig7-data1.xlsx]

## Sheet: Fig. 7B
Figure	Parameter	Statistical Test	P-value	Parameter	wt	syt1k R233Q ki	syt1k R233Q ki + CpxII	syt1k R233Q ki + CpxII DN	Tukey's multiple comparisons test	Mean Diff.	95.00% CI of diff.	Below threshold?	Summary	Adjusted P Value
Fig. 7 B	RRP	ANOVA	<0.0001	Number of values	35	39	18	11	wt vs. Syt1 R233Q ki	-105.6	-164.6 to -46.69	Yes	****	<0.0001
									wt vs. Syt1 R233Q ki + cpxII	-8.887	-82.34 to 64.56	No	ns	0.989
				Minimum	33.46	80.26	76.3	92.45	wt vs. Syt1 R233Q ki + cpxII ΔN	28.12	-62.68 to 118.9	No	ns	0.8499
				25% Percentile	100.4	160	139	101.5	Syt1 R233Q ki vs. Syt1 R233Q ki + cpxII	96.76	24.60 to 168.9	Yes	**	0.0038
				Median	151.9	246.6	177.5	134.1	Syt1 R233Q ki vs. Syt1 R233Q ki + cpxII ΔN	133.8	44.01 to 223.5	Yes	**	0.001
				75% Percentile	219.9	380	210	163.5	Syt1 R233Q ki + cpxII vs. Syt1 R233Q ki + cpxII ΔN	37.01	-62.87 to 136.9	No	ns	0.7676
				Maximum	418.5	579.5	288.8	219.1
				Mean	165.9	271.6	174.8	137.8
				Std. Deviation	81.22	128.3	56.88	41.51
				Std. Error of Mean	13.73	20.54	13.41	13.13
				Lower 95% CI	138	230	146.5	108.1
				Upper 95% CI	193.8	313.1	203.1	167.5
Figure	Parameter	Statistical Test	P-value	Parameter	wt	syt1k R233Q ki	syt1k R233Q ki + CpxII	syt1k R233Q ki + CpxII DN	Dunn's multiple comparisons test	Mean rank diff.	Significant?	Summary	Adjusted P Value
Fig. 7 B	SRP	Kruskal Wallis	0.0002	Number of values	35	39	18	10	wt vs. Syt1 R233Q ki	-23.07	Yes	**	0.0049
									wt vs. Syt1 R233Q ki + cpxII	2.197	No	ns	>0.9999
				Minimum	26.97	25.94	19.83	108	wt vs. Syt1 R233Q ki + cpxII ΔN	-30.41	Yes	*	0.0249
				25% Percentile	69.56	115.3	85.48	112	Syt1 R233Q ki vs. Syt1 R233Q ki + cpxII	25.26	Yes	*	0.0164
				Median	105.3	144.7	99.58	171.8	Syt1 R233Q ki vs. Syt1 R233Q ki + cpxII ΔN	-7.346	No	ns	>0.9999
				75% Percentile	139.2	180	132.4	202	Syt1 R233Q ki + cpxII vs. Syt1 R233Q ki + cpxII ΔN	-32.61	Yes	*	0.0312
				Maximum	261.1	360.7	247.9	224.2
				Mean	110.4	159	112.4	164.1
				Std. Deviation	50.88	69.9	54.4	43.19
				Std. Error of Mean	8.6	11.19	12.82	13.66
				Lower 95% CI	92.9	136.4	85.34	133.2
				Upper 95% CI	127.9	181.7	139.4	195
				Mean ranks	40.09	63.15	37.89	70.5
Figure	Parameter	Statistical Test	P-value	Parameter	wt	syt1k R233Q ki	syt1k R233Q ki + CpxII	syt1k R233Q ki + CpxII DN	Dunn's multiple comparisons test	Mean rank diff.	Significant?	Summary	Adjusted P Value
Fig. 7 B	SR	Kruskal Wallis	0.002	Number of values	35	39	18	11	wt vs. Syt1 R233Q ki	13.04	No	ns	0.3502
									wt vs. Syt1 R233Q ki + cpxII	27.96	Yes	**	0.0067
				Minimum	-7.883	-4.35	-4.299	-0.0001686	wt vs. Syt1 R233Q ki + cpxII ΔN	30.4	Yes	*	0.025
				25% Percentile	13.56	5.194	4.019	3.216	Syt1 R233Q ki vs. Syt1 R233Q ki + cpxII	14.91	No	ns	0.4614
				Median	20.41	13.27	7.957	6.83	Syt1 R233Q ki vs. Syt1 R233Q ki + cpxII ΔN	17.36	No	ns	0.5874
				75% Percentile	25.24	23.3	16.73	12.41	Syt1 R233Q ki + cpxII vs. Syt1 R233Q ki + cpxII ΔN	2.444	No	ns	>0.9999
				Maximum	45.61	52.02	23.28	27.36
				Mean	19.43	15.73	9.24	8.615
				Std. Deviation	10.92	13.44	7.551	7.859
				Std. Error of Mean	1.846	2.152	1.78	2.485
				Lower 95% CI	15.68	11.38	5.485	2.993
				Upper 95% CI	23.18	20.09	13	14.24
				Mean ranks	64.4	51.36	36.44	34

## Sheet: Fig. 7D
Figure	Parameter	Statistical Test	P-value	Parameter	wt	syt1k R233Q ki	syt1k R233Q ki + CpxII	syt1k R233Q ki + CpxII DN	Dunn's multiple comparisons test	Mean rank diff.	Significant?	Summary	Adjusted P Value
Fig. 7 D	tau RRP	Kruskal Wallis	<0.0001	Number of values	35	37	18	11	wt vs. Syt1 R233Q ki	-33.6	Yes	****	<0.0001
									wt vs. Syt1 R233Q ki + cpxII	-0.3079	No	ns	>0.9999
				Minimum	3.453	13.06	5.357	61.31	wt vs. Syt1 R233Q ki + cpxII ΔN	-60.99	Yes	****	<0.0001
				25% Percentile	13.86	27.21	15.38	79.77	Syt1 R233Q ki vs. Syt1 R233Q ki + cpxII	33.29	Yes	***	0.0004
				Median	20	39.32	23.28	115.1	Syt1 R233Q ki vs. Syt1 R233Q ki + cpxII ΔN	-27.39	Yes	*	0.0485
				75% Percentile	25.26	51.22	23.1	207.4	Syt1 R233Q ki + cpxII vs. Syt1 R233Q ki + cpxII ΔN	-60.68	Yes	****	<0.0001
				Maximum	50.29	200.9	49.47	275
				Mean	20.54	48.23	24.99	139.7
				Std. Deviation	9.385	34.12	9.069	72.95
				Std. Error of Mean	1.586	5.609	2.137	23.07
				Lower 95% CI	17.32	36.85	16.48	87.53
				Upper 95% CI	23.76	59.6	25.5	191.9
				Mean ranks	31.91	65.51	32.22	92.9
Figure	Parameter	Statistical Test	P-value	Parameter	wt	syt1k R233Q ki	syt1k R233Q ki + CpxII	syt1k R233Q ki + CpxII DN	Dunn's multiple comparisons test	Mean rank diff.	Significant?	Summary	Adjusted P Value
Fig. 7 D	tau SRP	Kruskal Wallis	<0.0001	Number of values	35	39	18	10	wt vs. Syt1 R233Q ki	-35.31	Yes	****	<0.0001
									wt vs. Syt1 R233Q ki + cpxII	2.568	No	ns	>0.9999
				Minimum	43.37	127.7	89.19	487.6	wt vs. Syt1 R233Q ki + cpxII ΔN	-50.94	Yes	****	<0.0001
				25% Percentile	133.4	279.8	134.4	519.5	Syt1 R233Q ki vs. Syt1 R233Q ki + cpxII	37.88	Yes	****	<0.0001
				Median	180.9	411.5	161.5	547.4	Syt1 R233Q ki vs. Syt1 R233Q ki + cpxII ΔN	-15.63	No	ns	0.8168
				75% Percentile	228.8	564.6	215.7	610.7	Syt1 R233Q ki + cpxII vs. Syt1 R233Q ki + cpxII ΔN	-53.51	Yes	****	<0.0001
				Maximum	967.2	705.8	1107	870.8
				Mean	213.2	423.3	217.9	580.6
				Std. Deviation	173.7	167.3	226.7	111.2
				Std. Error of Mean	29.36	26.78	53.44	35.17
				Lower 95% CI	153.5	369.1	105.2	501.1
				Upper 95% CI	272.8	477.5	330.6	660.2
				Mean ranks	33.46	68.77	30.89	84.4
Figure	Parameter	Statistical Test	P-value	Parameter	wt	syt1k R233Q ki	syt1k R233Q ki + CpxII	syt1k R233Q ki + CpxII DN	Dunn's multiple comparisons test	Mean rank diff.	Significant?	Summary	Adjusted P Value
Fig. 7 D	delay	Kruskal Wallis	<0.0001	Number of values	35	39	18	11	wt vs. Syt1 R233Q ki	-39.28	Yes	****	<0.0001
									wt vs. Syt1 R233Q ki + cpxII	-12.82	No	ns	0.7767
				Minimum	3.287	4.331	4.293	7.96	wt vs. Syt1 R233Q ki + cpxII ΔN	-65.27	Yes	****	<0.0001
				25% Percentile	4.402	7.173	5.102	17.08	Syt1 R233Q ki vs. Syt1 R233Q ki + cpxII	26.46	Yes	**	0.0086
				Median	5.164	8.637	5.874	22.23	Syt1 R233Q ki vs. Syt1 R233Q ki + cpxII ΔN	-25.99	No	ns	0.0904
				75% Percentile	5.842	13.26	6.864	29.98	Syt1 R233Q ki + cpxII vs. Syt1 R233Q ki + cpxII ΔN	-52.45	Yes	****	<0.0001
				Maximum	10.58	24.43	13.14	44.31
				Mean	5.459	10.62	6.629	23.73
				Std. Deviation	1.584	5.121	2.6	10.81
				Std. Error of Mean	0.2678	0.8201	0.5813	3.418
				Lower 95% CI	4.915	8.955	5.412	16
				Upper 95% CI	6.003	12.28	7.846	31.46
				Mean ranks	29.03	68.31	41.85	94.3

## Sheet: Fig. 7F
Figure	Parameter	Statistical Test	P-value	Parameter	wt	Syt1 R233Q ki	Syt1 R233Q ki + cpxII	Syt1 R233Q ki + cpxII ΔN	Dunn's multiple comparisons test	Mean rank diff.	Significant?	Summary	Adjusted P Value
Fig. 7H	premature secretion	Kruskal-Wallis	0.0002	Number of values	35	31	25	11	wt vs. Syt1 R233Q ki	4.275	No	ns	>0.9999
									wt vs. Syt1 R233Q ki + cpxII	27.09	Yes	**	0.0026
				Minimum	-12.29	-5.7	-29.9	-39.78	wt vs. Syt1 R233Q ki + cpxII ΔN	33.19	Yes	*	0.0102
				25% Percentile	1.764	0.3629	-7.306	-15.25	Syt1 R233Q ki vs. Syt1 R233Q ki + cpxII	22.82	Yes	*	0.0247
				Median	7.164	4.411	-0.4214	-3.634	Syt1 R233Q ki vs. Syt1 R233Q ki + cpxII ΔN	28.92	Yes	*	0.0432
				75% Percentile	13.69	13.29	3.714	5.284	Syt1 R233Q ki + cpxII vs. Syt1 R233Q ki + cpxII ΔN	6.1	No	ns	>0.9999
				Maximum	46.14	33.43	15.06	9.975
				Mean	9.338	8.215	-1.619	-6.466
				Std. Deviation	12.93	10.67	9.927	14.77
				Std. Error of Mean	2.155	1.916	1.985	4.669
				Lower 95% CI	4.962	4.303	-5.717	-17.03
				Upper 95% CI	13.71	12.13	2.478	4.097
				Mean ranks	62.69	58.42	35.6	29.5
