# Supplementary material for: Key determinants of the dual clamp/activator function of Complexin
Source: eLife. 2024 Nov 25;12:RP92438. doi: 10.7554/eLife.92438 (PMC11589869; doi:10.7554/eLife.92438)
Supplement: Figure 8—source data 1. [file elife-92438-fig8-data1.xlsx]

## Sheet: Fig. 7B
Figure	Parameter	Statistical Test	P-value	Parameter	syt1k R233Q ki + CpxII	syt1k R233Q ki	syt1k R233Q ki + CpxII DN	Tukey's multiple comparisons test	Mean Diff.	95.00% CI of diff.	Below threshold?	Summary	Adjusted P Value
Fig. 8 C	P50 value [µM]	ANOVA	<0.0001	Number of values	12	14	11	SytI R233Q+CpxII vs. SytI R233Q	-5.097e-06	-9.340e-006 to -8.544e-007	Yes	*	0.0156
								SytI R233Q+CpxII vs. SytI R233Q+CpxII_ΔN	-7.172e-06	-1.167e-005 to -2.671e-006	Yes	**	0.0012
				Minimum	2.209e-06	3.501e-06	6.129e-06	SytI R233Q vs. SytI R233Q+CpxII_ΔN	-2.075e-06	-6.421e-006 to 2.270e-006	No	ns	0.4786
				25% Percentile	2.993e-06	4.499e-06	1.109e-05
				Median	4.376e-06	6.368e-06	1.203e-05
				75% Percentile	6.761e-06	1.672e-05	1.411e-05
				Maximum	9.086e-06	1.953e-05	1.694e-05
				Mean	4.86e-06	9.957e-06	1.203e-05
				Std. Deviation	2.142e-06	6.25e-06	3.167e-06
				Std. Error of Mean	6.184e-07	1.67e-06	9.548e-07
				Lower 95% CI	3.498e-06	6.348e-06	9.905e-06
				Upper 95% CI	6.221e-06	1.357e-05	1.416e-05
